22 **Abstract:**

23 Virulence and metabolism are often interlinked to control the expression of essential  
24 colonisation factors in response to host-associated signals. Here, we identified a novel  
25 transporter of the dietary monosaccharide L-arabinose that is widely encoded by the zoonotic  
26 pathogen enterohaemorrhagic *Escherichia coli* (EHEC), required for full competitive fitness in  
27 the mouse gut and highly expressed during human infection. Accordingly, we discovered that  
28 L-arabinose induces expression of the EHEC type 3 secretion system, enhancing its ability to  
29 attach to host cells, and that the underlying mechanism is dependent on products of its  
30 catabolism rather than the sensing of L-arabinose as a signal. Finally, using the murine  
31 pathogen *Citrobacter rodentium*, we show that L-arabinose metabolism provides a fitness  
32 benefit during enteric infection via virulence factor regulation, as opposed to supporting  
33 pathogen growth. This study describes an intrinsic mechanism of integrating central sugar  
34 metabolism with virulence regulation and highlights the unexpected impact that nutrient  
35 utilisation can have in enteric pathogens.

## 36 Introduction

37 The mammalian gastrointestinal tract poses a formidable barrier to infection by foreign  
38 pathogens. Invaders must sidestep a combination of intrinsic host defences as well as  
39 overcome colonisation resistance by the native gut microbiota<sup>1</sup>. Accordingly, bacterial  
40 pathogens have evolved many unique strategies to effectively compete with the microbiota  
41 and cause infection within a favourable host-niche<sup>2</sup>. This includes a combination of pathogen  
42 specific virulence mechanisms and metabolic adaptations that increase within-host fitness.  
43 Importantly, virulence and fitness factor regulation often coincide and are dynamically  
44 controlled in response to the host environment to maximise competitiveness therein<sup>3-5</sup>.

45

46 Enterohaemorrhagic *Escherichia coli* (EHEC) is a zoonotic pathogen that causes severe  
47 diarrhoeal illness in humans and, in extreme cases, renal failure<sup>6,7</sup>. EHEC is a member of the  
48 attaching and effacing (A/E) family of pathogens, which intimately colonise the colonic  
49 epithelium forming characteristic pedestal-like lesions on the surface of host cells<sup>8,9</sup>. A/E  
50 pathogenesis is defined by the activity of a type 3 secretion system (T3SS) encoded on a ~35  
51 kb horizontally acquired island known as the locus of enterocyte effacement (LEE)<sup>10-12</sup>. This  
52 T3SS translocates more than 30 effector proteins - encoded on the LEE and several additional  
53 horizontally acquired elements, termed O-islands (OIs) - that collectively subvert host cell  
54 function<sup>13-16</sup>. The murine pathogen *Citrobacter rodentium* also encodes the LEE and has been  
55 adopted as the relevant surrogate model to study EHEC pathogenesis *in vivo* due to its  
56 dependency on the T3SS, comparable pathology and lack of requirement to pre-treat mice  
57 with antibiotics<sup>17-19</sup>.

58

59 The LEE-encoded T3SS is essential for overcoming microbiota-dependent colonisation  
60 resistance<sup>20,21</sup>. Epithelial attachment does not depend on a tissue receptor interaction.  
61 Instead, the LEE is uniquely controlled in response to a multitude of host and microbiota  
62 derived signals such as sugars, amino acids, short- and long-chain fatty acids and hormones  
63 that are integrated into a regulatory network ensuring correct spatial deployment of the  
64 T3SS<sup>3-5</sup>. For example, D-glucose represses the LEE whereas gluconeogenic substrates  
65 encountered at the epithelial surface (such as succinate) enhance its expression<sup>22,23</sup>; L-  
66 arginine found in abundance in the gut is directly sensed to activate the LEE, whereas the  
67 amino acid D-serine, abundant in the urinary tract, represses the LEE thus restricting EHEC to  
68 the gut niche<sup>24-26</sup>. A/E pathogenesis therefore hinges on nutrient availability, by promoting  
69 competition with the commensal microbiota as well as regulating essential virulence factors.  
70  
71 *E. coli* as a species relies on cross-feeding of microbiota liberated mono- and disaccharide  
72 sugars as it cannot degrade complex dietary polysaccharides<sup>27</sup>. However, EHEC has evolved  
73 to utilise a unique hierarchy of sugars compared to commensal *E. coli*, therefore implying a  
74 strategy to limit competition with similar members of the microbiota for critical resources<sup>28</sup>.  
75 L-arabinose is one such resource and highly abundant in nature as a major constituent of plant  
76 cell walls<sup>29</sup>. *E. coli* transports L-arabinose into the cell via the H<sup>+</sup> symporter AraE and the ATP-  
77 binding cassette (ABC) transporter AraFGH. The transcription factor AraC then senses  
78 cytosolic L-arabinose and upregulates both transporters as well as the AraBAD enzymes  
79 essential for its metabolism, a mechanism enhanced by the presence of cyclic AMP that  
80 increases during D-glucose depletion<sup>30</sup>. Here, we show that L-arabinose utilisation is exploited  
81 by A/E pathogens during infection. Surprisingly, this occurs independently of its role as a  
82 source of nutrition. Instead, this advantage is achieved via a mechanism that links metabolism

83 and virulence regulation. Transcriptome analysis revealed that L-arabinose upregulates  
84 expression of the LEE-encoded T3SS. Importantly, this relies on the uptake and breakdown of  
85 L-arabinose in the cell, acting as regulatory trigger as opposed to supporting pathogen growth  
86 *in vivo*. Finally, we also describe the identification of a novel L-arabinose uptake system that  
87 is widely encoded by T3SS-encoding EHEC strains in nature. We hypothesise that this system  
88 gives EHEC an enhanced capacity to scavenge L-arabinose in the gut, which therefore provides  
89 a fitness advantage via the convergence of virulence regulation and metabolism.

90 **Results**

91 **A novel accessory L-arabinose uptake system is widely encoded by EHEC isolates in nature**

92 While analysing our previously determined *C. rodentium* *in vivo* transcriptome, we noticed  
93 that genes related to monosaccharide uptake and metabolism were some of the most highly  
94 upregulated during infection<sup>21</sup>. Among these was ROD\_24811, an uncharacterised gene  
95 displaying ~20-fold induction in the colon and predicted to encode a periplasmic binding  
96 protein of a simple sugar ABC transporter. A search for homologues in EHEC did not find an  
97 exact match but instead identified a similar uncharacterised 4.4Kb ABC-transporter locus (>60  
98 % nucleotide identity) that appeared to be EHEC-specific, displaying a unique genetic context,  
99 being located on OI-island 17. We therefore focused our efforts on the role of this system  
100 given its relevance to EHEC and potentially human infection. This locus was predicted to  
101 encode a periplasmic binding protein (Z0415), an ATPase (Z0416-7) and two permease  
102 subunits comprised of  $\alpha$ -helices (Z0418/Z0419), characteristic of Type II ABC transporters<sup>31</sup>.  
103 *In silico* modelling of Z0415-9 using AlphaFold2 supported this, by displaying the expected  
104 modular structure of an inner membrane ABC transporter (Fig. 1a). InterPro analysis of the  
105 associated amino acid sequences identified domain signatures related to pentose  
106 monosaccharide substrate specificity and comparison with known *E. coli* systems supported  
107 that Z0415 clustered closely with monosaccharide ABC transporters (Extended Data Fig. 1).  
108 Presence/absence analysis of Z0415-9 carriage amongst 949 representative *E. coli* genomes  
109 revealed that the locus is not completely conserved across the species phylogeny (Fig. 1b).  
110 For instance, Z0415-19 is carried predominantly amongst isolates from phylogroups B1 and E  
111 (397/445 strains), comprised largely of EHEC strains, whereas phylogroups A and B2 (largely  
112 commensal and extraintestinal isolates, respectively) largely lack this system. Strikingly, there  
113 was a significant correlation between Z0415-9 and LEE carriage (Odds ratio = 35.9;  $P < 0.001$ ),

114 with the converse scenario (LEE positive, Z0415-9 negative) being an incredibly rare event  
115 (8/948 strains) (Fig. 1c). This suggests that there may be conflating evolutionary pressures for  
116 LEE-encoding EHEC strains to acquire Z0415-9, implicating its associated function in pentose  
117 sugar scavenging as being potentially beneficial for EHEC infection.

118

119 To assess the function of Z0415-9, we generated a transcriptional reporter (EHEC transformed  
120 with *pMK1/ux-P<sub>Z0415-9</sub>*) and cultured this in MEM-HEPES supplemented with either D-xylose,  
121 D-ribose or L-arabinose. Z0415-9 promoter activity was induced in a concentration-dependent  
122 manner exclusively in response to L-arabinose and we validated this result using RT-qPCR (Fig.  
123 2a; Extended Data Fig. 2a/b). Additionally, we confirmed that Z0415-9 induction occurs  
124 exclusively in response to L-arabinose and not D-arabinose, the less common form of this  
125 sugar found in nature (Extended Data Fig. 2c). We next hypothesised that Z0415-9 might be  
126 regulated similarly to the canonical L-arabinose machinery. Activity of *pMK1/ux-P<sub>Z0415-9</sub>* in a  
127  $\Delta$ *araC* background was completely abolished during growth with L-arabinose. Importantly this  
128 could be complemented by expressing *araC in trans*, suggesting that this horizontally acquired  
129 system is co-regulated with the canonical L-arabinose utilisation machinery (Fig. 2b). We  
130 therefore named this locus Aau, for accessory L-arabinose uptake system.

131

132 Deletion of Aau did not result in a significant growth defect during *in vitro* growth on L-  
133 arabinose (Extended Data Fig. 3). We therefore hypothesised that it may play a more  
134 important role in the host-context during nutrient competition. To test this, we orally  
135 inoculated streptomycin treated BALB/c mice with a 1:1 mixture of wild type EHEC and  $\Delta$ *aau*  
136 (Fig. 2c)<sup>28</sup>. While both strains initially colonised equally well,  $\Delta$ *aau* was significantly  
137 attenuated for longer term persistence displaying a 10 to 100-fold decrease in competitive

138 fitness from day 9 onwards (Fig. 2d). This result implies that Aau provides a fitness benefit to  
139 EHEC within the complex and dynamic gut niche.

140

### 141 **L-arabinose alters the EHEC transcriptome and enhances expression of the LEE-encoded** 142 **T3SS**

143 Our discovery of Aau prompted us to investigate the effects of L-arabinose utilisation on  
144 EHEC. Nutrients often act as signals that modulate virulence gene expression. We therefore  
145 hypothesised that L-arabinose may affect the expression of key EHEC virulence genes, as well  
146 as being able to act as a source of nutrition. To test this, we performed RNA-seq on EHEC  
147 cultured in MEM-HEPES with and without 1 mg/ml L-arabinose to late exponential phase.  
148 Strikingly, we identified 1187 significant ( $>1.5$  fold-change; FDR  $P < 0.05$ ) differentially  
149 expressed genes (DEGs) (Fig. 3a; Supplementary Table 1). As expected, the canonical L-  
150 arabinose utilisation genes (*araBAD*, *araE*, *araFGH*), as well as genes encoding Aau, were  
151 among the most strongly upregulated displaying increased expression of up to 42-fold ( $P <$   
152  $0.001$ ). Functional network analyses identified that the large abundance of DEGs unrelated to  
153 L-arabinose clustered into diverse biological pathways including metabolism, quorum  
154 sensing, signalling and regulation of biofilm formation (Extended Data Fig. 4a/b). While we  
155 anticipated shifts in expression of genes related to metabolism, we also noticed that several  
156 genes belonging to the LEE pathogenicity island were significantly upregulated in response to  
157 L-arabinose (Fig. 3b).

158

159 The LEE is essential for EHEC pathogenicity and is responsive to gut-associated cues. We  
160 therefore reasoned that L-arabinose may provide a fitness advantage through regulating T3SS  
161 activity either in concert to, or independent from a role in host-associated nutritional



162 competition. To assess the dynamics of LEE induction by L-arabinose, we engineered a  
163 transcriptional reporter of the T3SS (EHEC transformed with pMK1/*lux-P<sub>LEE1</sub>*). Culture of this  
164 strain in MEM-HEPES (LEE-inducing conditions) supplemented with various concentrations of  
165 L-arabinose resulted in no increase in growth rate but a significant and prolonged increase in  
166 LEE promoter activity from late exponential phase onwards (Fig. 3c). RT-qPCR also confirmed  
167 a significant increase in transcription across all five LEE operons (Extended Data Fig. 5a). We  
168 detected an increase in LEE expression in the presence of L-arabinose at concentrations as  
169 low as 50 µg/ml (Extended Data Fig. 5b), within range of the amount quantified from the  
170 luminal content and faeces of mice maintained on a conventional diet (Extended Data Fig.  
171 5c). We next observed an increased accumulation of T3SS associated effector proteins in the  
172 cytosol and cell-free supernatant by SDS-PAGE and western blot analysis (Fig. 3d). To test if  
173 this increase in T3SS expression and function resulted in enhanced host-cell interaction, we  
174 quantified adhesion of EHEC to cultured epithelial cells by fluorescence microscopy (Fig. 3e).  
175 Pre-exposing EHEC to L-arabinose before infection of epithelial cells significantly increased  
176 the number of attached EHEC and associated A/E lesions (identified as foci of actin  
177 accumulation) per infected cell (Fig. 3f). This was in parallel with an >10% increase in the  
178 number of individually infected cells in the presence of L-arabinose. These results collectively  
179 show that L-arabinose enhances the expression and function of the LEE-encoded T3SS,  
180 resulting in a greater capacity to cause A/E lesions on the host epithelial surface.

181

### 182 **Metabolism of L-arabinose is essential to enhance T3SS expression**

183 Nutrient sensing typically occurs either from the environmental (via two-component systems)  
184 or via a cognate transcription factor in the cytosol<sup>32</sup>. Due to L-arabinose utilisation occurring  
185 at three levels (uptake via multiple transporters, sensing by a dedicated transcription factor

186 and metabolism via AraBAD), this left the mechanism of T3SS regulation by L-arabinose  
187 unclear, as in principle it could occur at any of these three stages (Extended Data Fig. 6a)<sup>30</sup>.  
188 We therefore generated mutants in each component, first validating their roles in L-arabinose  
189 utilisation (Extended Data Fig. 6b), allowing compartmentalisation of each stage to explore  
190 the mechanism of T3SS enhancement. We first measured LEE activity in  $\Delta araC$  and observed  
191 a complete reversal of L-arabinose enhanced T3SS expression. This was complemented *in*  
192 *trans* suggesting that sensing via AraC may directly regulate LEE expression (Fig. 4a). Next, we  
193 measured LEE activity in the  $\Delta araBAD$ ,  $\Delta araFGH$  and  $\Delta araE$  backgrounds. This revealed that  
194 enhanced LEE expression was also abolished in  $\Delta araBAD$ , but not in the  $\Delta araFGH$  background  
195 and only partially in  $\Delta araE$ , likely since there are multiple routes for L-arabinose uptake and  
196 in line with the major dependence on AraE for growth on this sugar (Fig. 4b; Extended Data  
197 Fig. 6b). To narrow down the mechanism further, we measured LEE expression in  $\Delta araC$   
198 transformed with plasmids constitutively expressing either *araBAD* and *araE* in parallel (pSU-  
199 *araBAD/E*) or *araE* alone (pSU-*araE*), allowing functional differentiation between uptake and  
200 downstream metabolism in the cytosol (Extended Data Fig. 6b). The logic behind this  
201 experiment was that *araBAD* and *araE* expression (and therefore uptake and metabolism) is  
202 completely dependent upon AraC<sup>33</sup>. Therefore, bypassing the role of AraC using constitutively  
203 expressed *araBAD/araE* allowed us to conclusively determine whether L-arabinose sensing  
204 by AraC, uptake or metabolism caused enhanced LEE expression. Complementation of  $\Delta araC$   
205 with pSU-*araBAD/E* resulted in complete restoration of L-arabinose enhanced LEE expression  
206 above wild type levels, whereas constitutive expression of AraE alone (pSU-*araE*) had no  
207 restorative effect (Fig. 4c). Taken together, these data comprehensively show that L-  
208 arabinose metabolism (via AraBAD) in the cytosol is essential to enhance T3SS expression in  
209 response to this sugar.

210

211 To understand the ecological context of these results, we measured the temporal dynamics  
212 of *araBAD* transcription compared to the LEE, showing that induction of L-arabinose  
213 metabolism under these conditions significantly correlates ( $R = 0.92$ ;  $P < 0.001$ ) with LEE  
214 expression dynamics (Extended Data Fig. 7a). MEM-HEPES contains D-glucose, which  
215 suppresses L-arabinose utilisation genes by catabolite repression<sup>30,33</sup>. Glycolytic growth is also  
216 known to reduce maximal LEE expression<sup>22</sup>. We therefore reasoned that the temporal  
217 dynamics of our mechanism likely represented the switch to L-arabinose catabolism as D-  
218 glucose became depleted from the medium. Using thin layer chromatography, we measured  
219 the relative abundance of monosaccharides in cell-free supernatant of EHEC cultured in MEM-  
220 HEPES alone or supplemented with L-arabinose (Extended Data Fig. 7b). The data confirmed  
221 that D-glucose depletion coincided with activation of *AraBAD* (and as such, the LEE). This  
222 offered a logical explanation as to why enhanced LEE expression in response to L-arabinose  
223 metabolism was observed only at this stage of growth, when the repressive effects of D-  
224 glucose on *araBAD* and the LEE would no longer be a factor (Extended Data Fig. 7c). This  
225 suggests that dynamic changes in nutrient availability that likely occur within the complex  
226 host environment could have important downstream effects on the mechanisms of virulence  
227 factor regulation.

228

### 229 **An intrinsic, generalised mechanism of T3SS regulation via pentose sugar metabolism**

230 L-arabinose metabolism, like other aldopentose sugars such as D-ribose and D-xylose, can  
231 generate cellular energy via the pentose phosphate shunt<sup>30</sup>. While each sugar can support *E.*  
232 *coli* growth using dedicated genes, their metabolism converges at the generation of D-  
233 xylulose-5-phosphate, which enters the Embden-Meyerhof pathway and ultimately produces

234 pyruvate to generate cellular energy (Fig. 5a). It has been previously shown that exogenous  
235 pyruvate can enhance LEE expression<sup>34</sup>. We therefore reasoned that the observed effect of L-  
236 arabinose on expression of the T3SS could be due to excess pyruvate generation and  
237 hypothesised that D-ribose or D-xylose may have a similar effect, given their common cellular  
238 fate. Strikingly, enhanced LEE expression dynamics were also observed when EHEC was  
239 cultured in the presence of either sugar (Fig. 5b). Importantly, deletion of the D-ribose  
240 utilisation genes ( $\Delta rbsDACBKR$ ) eliminated the ability to grow on this sugar as a sole carbon  
241 source and, as predicted, abolished the observed increase in T3SS expression, suggesting that  
242 the common features of cellular pentose sugar metabolism determine the regulatory effect  
243 on the LEE (Fig. 5c). This is in line with our finding that L-arabinose must be metabolised to  
244 exert its T3SS regulatory effect. Finally, we confirmed that addition of pyruvate to the medium  
245 enhanced LEE expression and demonstrated that growth in the presence of both exogenous  
246 pyruvate and L-arabinose displayed an additive effect, further enhancing T3SS expression  
247 levels (Fig. 5d). This suggests that the common cellular fate of pentose sugar metabolism and  
248 generation of key downstream metabolites is a generalised mechanism by which A/E  
249 pathogens can regulate virulence gene expression.

250

### 251 **L-arabinose metabolism is required for maximal fitness during enteric infection**

252 While L-arabinose metabolism has been reported to provide a fitness advantage to *E. coli*  
253 during colonisation of streptomycin-treated mice, this model does not reflect A/E  
254 pathogenesis and therefore the role of L-arabinose utilisation during infection was  
255 unknown<sup>28</sup>. To test this, we employed *C. rodentium* as a model A/E pathogen, first confirming  
256 that L-arabinose also enhanced its T3SS expression (Extended Data Fig. 8). We next compared  
257 the ability of wild type *C. rodentium* and a  $\Delta araBAD$  derivative to colonise BALB/c mice (n =

258 10). During the early stages of infection, bacterial burdens in faeces were similar between the  
259 two strains (days 1 to 9 post-infection). However, during the infectious peak at day 13 and  
260 onwards into the resolving phase, we observed a significantly more rapid clearance of  
261  $\Delta araBAD$  from the mice when compared to wild type (Fig. 6a). To directly test if L-arabinose  
262 utilisation conferred a competitive fitness advantage, we orally infected mice with a 1:1  
263 mixture of wild type *C. rodentium* and  $\Delta araBAD$  (n = 10). The  $\Delta araBAD$  mutant was more  
264 significantly outcompeted by the wild type in a competitive infection, displaying an increasing  
265 fitness defect from day 9 until termination at day 21 (Fig. 6b). To determine whether the  
266 fitness defect was associated with tissue adhered or luminal *C. rodentium*, we quantified the  
267 bacterial burden of colon sections from mono-infected mice that were cleared of the luminal  
268 content. In agreement with the faecal counts, colon-associated  $\Delta araBAD$  were recovered in  
269 significantly fewer numbers than wild type *C. rodentium* suggesting that L-arabinose  
270 metabolism actively promotes colonisation of host-tissue (Fig. 6c).

271

272 Finally, we aimed to determine whether the observed fitness defect of  $\Delta araBAD$  was driven  
273 by the inability to utilise L-arabinose as nutrient or lack of its input as a positive stimulus for  
274 regulation of the LEE. To test this, we generated  $\Delta araBAD$  in *C. rodentium*<sup>P<sub>ler</sub>-const</sup>, a strain that  
275 expresses the LEE constitutively via a single base deletion in the -30 element of the *ler*  
276 promoter<sup>21,35</sup>, and tested its colonisation dynamics in mice (n=9). While *C. rodentium*<sup>P<sub>ler</sub>-const</sup>  
277 displayed similar colonisation dynamics to that of the wild type strain,  $\Delta araBAD$ <sup>P<sub>ler</sub>-const</sup> no  
278 longer displayed a significant decrease in within-host fitness (Fig. 6d). This suggested that  
279 constitutive expression of the T3SS can overcome the fitness defect of  $\Delta araBAD$  by mimicking  
280 the stimulatory effect that L-arabinose metabolism imparts on the LEE and suggesting that  
281 during a natural infection *C. rodentium* does not require L-arabinose as a source of nutrition.

## 282 Discussion

283 Successful cross-feeding on nutrients derived from the host, microbiota or diet is essential for  
284 bacterial pathogens to overcome colonisation resistance and replicate within their preferred  
285 host-niche<sup>1,2</sup>. Moreover, nutrients that support growth can often be “sensed” as stimuli that  
286 trigger virulence gene expression, therefore coupling virulence and metabolism to maximise  
287 fitness<sup>2-5</sup>. Here, we have found that metabolism of L-arabinose by A/E pathogens promotes  
288 within-host fitness by generating central metabolites that converge with regulation of  
289 virulence. While L-arabinose supports the growth of EHEC and *C. rodentium* *in vitro*, it is not  
290 required as a source of nutrition during infection of mice. Instead, its catabolism to pyruvate  
291 stimulates expression of the LEE-encoded T3SS, a virulence factor essential for colonisation,  
292 which provides an advantage during host-colonisation. We suggest that this underlying  
293 mechanism revolving around the generation of central metabolic products that enhance LEE  
294 expression is generalisable for other pentose sugars with a similar cellular fate. We also  
295 identified a novel ABC transporter, termed Aau, that is selectively induced in response to L-  
296 arabinose exclusively, suggesting that EHEC has an enhanced ability to scavenge L-arabinose  
297 in the gut and maximise its competitiveness through the convergence of virulence and  
298 metabolism.

299

300 Freter’s nutrient-niche hypothesis suggests that within the complex, multi-species  
301 environment of the gut, an invading pathogen must be able to utilise at least one limiting  
302 nutrient better than the commensals it competes with<sup>27,36</sup>. L-arabinose-containing  
303 polysaccharides are a major component of dietary fibre, with free L-arabinose being highly  
304 enriched in the colon of humans and animals<sup>37,38</sup>. As such, non-starch hydrolysis and  
305 degradation of L-arabinose-containing polysaccharides by saccharolytic members of the gut

306 microbiota could liberate free L-arabinose that is subsequently exploited by species such as  
307 *E. coli* during the process of cross-feeding<sup>39–43</sup>. Indeed, research from the labs of Conway and  
308 Cohen describing carbon nutrition of *E. coli in vivo*, has shown that L-arabinose is utilised by  
309 both commensal and EHEC strains in the streptomycin-treated mouse intestine<sup>28</sup>.  
310 Furthermore, they described how EHEC metabolises L-arabinose earlier in the hierarchy of  
311 carbon utilisation than a commensal strain, when grown on a mixture of sugars. This suggests  
312 that L-arabinose is an important nutrient for *E. coli* to sustain growth within the mammalian  
313 intestine and that EHEC has evolved an enhanced ability to do this.

314

315 An enhanced ability of EHEC to utilise L-arabinose may be achieved by more efficient  
316 breakdown within or uptake into the cell. Our discovery of the novel L-arabinose ABC  
317 transporter Aau suggests that the latter may be particularly important in providing EHEC with  
318 a competitive edge in nature. Indeed, despite Aau being encoded on an O-island without a  
319 dedicated regulatory system<sup>15</sup>, we have found that its activation relies on the core genome-  
320 encoded AraC in a manner akin to the canonical L-arabinose utilisation machinery<sup>33</sup>. This  
321 results in a rapid and co-ordinated response to the sugar by inducing the expression of  
322 multiple uptake systems. While we are currently investigating the underlying mechanisms  
323 (affinity and kinetics of uptake in comparison to the canonical AraE/FGH uptake systems) of  
324 this transporter, there have been other reports of Aau induction in ecologically relevant  
325 scenarios that support its likely role in EHEC infection. Transcriptome studies of EHEC in  
326 response to spinach and lettuce lysates found that the canonical L-arabinose genes and those  
327 encoding Aau were significantly upregulated, indicating a potential dietary source of L-  
328 arabinose<sup>29,44</sup>. Furthermore, the permease was identified as being one of the most highly  
329 expressed EHEC proteins during human infection using *in vivo* antigen detection technology<sup>45</sup>,

330 which is particularly noteworthy considering that *C. rodentium* (a dedicated murine  
331 pathogen) does not encode this system<sup>46</sup>. This therefore provides compelling evidence that  
332 Aau, and its role in L-arabinose scavenging, likely represents a crucial element of the real-  
333 world, human infectious context.

334

335 Our discovery that L-arabinose metabolism is required for regulation of the T3SS reveals new  
336 insights into how we perceive virulence factor control in the host context. Traditionally,  
337 nutrients or small metabolites are thought to be “sensed” either in the cytosol post-uptake  
338 by a cognate transcription factor, or from the environment by periplasmic interactions with  
339 two-component systems. This is indeed true of pyruvate, which has been described as a  
340 virulence-inducing signal in many species beyond *E. coli*. For example, both *Staphylococcus*  
341 *aureus* and *Salmonella* Typhimurium upregulate virulence gene expression in response to  
342 host-derived pyruvate via two-component systems, the latter of which is particularly  
343 noteworthy here as this regulation occurred independently of any growth advantage<sup>47,48</sup>. Our  
344 proposed mechanism provides new evidence that the endogenous metabolism of certain  
345 molecules, that do not in themselves act as “signals”, can cause dramatic shifts in the  
346 pathogen response. This follows on from our recent study where we found that metabolism  
347 of microbiota-derived 1,2-propanediol generates the short chain fatty acid propionate, which  
348 in turn provides a signal that activates LEE expression in *C. rodentium* independently of a  
349 growth advantage<sup>21</sup>. In a comparable manner, uropathogenic *E. coli* produces excess pyruvate  
350 via serine deamination, which in turn results in increased sensing of pyruvate via a two-  
351 component system and subsequent uptake<sup>49</sup>. These studies collectively point to alternative  
352 mechanisms of virulence and fitness regulation whereby “signals” are generated  
353 endogenously by the pathogen based on the biochemical status of the environment.



354 Importantly, it also alludes to a more complex view of the consequences of niche adaptation,  
355 whereby metabolic systems can provide additional underappreciated benefits to a pathogen  
356 through the regulation of genetically unlinked virulence factors. The mechanism of L-  
357 arabinose induced LEE expression also reinforces the benefit of being able to dynamically shift  
358 between available nutrients *in vivo* that are likely to be in constant flux and thus would aid in  
359 limiting any associated repressive effects of catabolite repression on virulence gene  
360 expression<sup>22,27,28</sup>.

361

362 Finally, while the canonical L-arabinose utilisation pathway has been understood and  
363 exploited in bacterial genetics for decades, the relevance of L-arabinose metabolism in  
364 promoting pathogenesis has only recently emerged. Dietary L-arabinose utilisation by *S.*  
365 *Typhimurium* promotes expansion in the gastrointestinal tract of mice<sup>50</sup>. This occurs via a  
366 mechanism involving an intrinsic alpha-N-arabinofuranosidase that liberates the sugar from  
367 dietary polysaccharides. Dietary fibre is traditionally thought to provide a benefit in  
368 maintaining colonisation resistance via maintenance of microbiota composition, the mucosal  
369 barrier and short chain fatty acid production<sup>51-53</sup>. The data from Ruddle *et al.* and ours  
370 therefore highlight the diverse strategies that enteric pathogens can also use to take  
371 advantage of fibre-derived sources of nutrition. Indeed, EHEC utilises several strategies to  
372 achieve this. For example, sensing of pectin-derived galacturonic acid promotes initial  
373 expansion in the mouse gut while also directly regulating LEE expression throughout the  
374 infection lifespan<sup>54</sup>. These studies collectively highlight the diverse strategies that enteric  
375 pathogens use to exploit the host diet and aid in overcoming colonisation resistance.

376

377 In summary, we have identified a new mechanism by which A/E enteric pathogens regulate  
378 an essential virulence factor in response to host associated L-arabinose and identified novel  
379 genes involved in its uptake from the environment. Our data reveal that important pathogenic  
380 processes can be controlled via central metabolism of sugars independently of any effects on  
381 growth, warranting a new perspective on this process and its potential impact in bacterial  
382 pathogens. We anticipate that by expanding our view of how nutrient “sensing” occurs via  
383 metabolism we have the potential to discover new mechanisms of bacterial virulence  
384 regulation that are highly relevant to the host context. While our studies using *C. rodentium*  
385 cannot rule out that L-arabinose metabolism may benefit EHEC on a nutritional level in certain  
386 contexts (such as during human infection), the results highlight how virulence factor  
387 regulation can provide additional benefits for overcoming colonisation resistance. Lastly, by  
388 identifying further functional distinctions between EHEC and *C. rodentium* (exemplified here  
389 by the EHEC-specific Aau), we may reveal genetic factors that dictate host-range of these  
390 human and murine pathogens exclusively.

391 **Acknowledgements**

392 We are very grateful to Dr Nicky O’Boyle for his critical appraisal of the work. We also would  
393 like to thank the Comparative Biology Centre staff for their support with the animal studies  
394 and the Newcastle University Genomics Core Facility for RNA-sequencing. This work was  
395 supported by a Springboard Award from the Academy of Medical Sciences/Wellcome Trust  
396 [SBF005\1029], a Royal Society Research Grant [RGS\R2\202100], a Medical Research Council  
397 Career Development Award [MR/X007197/1] and a Faculty Fellowship (Newcastle University)  
398 awarded to J.P.R.C. E.C.L was supported by a Wellcome Trust Discovery Award  
399 [226644/Z/22/Z]. C.C. was supported by a PhD studentship from the Barbour Foundation.

400

401 **Author contributions**

402 C.C. and J.P.R.C conceptualised and designed the research. C.C. and J.P.R.C. performed the  
403 research. C.C., R.T.W., L.C.B., R.G. and J.P.R.C. analysed the data. C.J.S., S.A.B., R.G., E.C.L. and  
404 J.P.R.C. contributed reagents/analytical tools. C.C. and J.P.R.C. wrote the paper with input  
405 from all other authors.

406

407 **Competing interest**

408 The authors declare no competing interest

## 409 **Materials and methods**

### 410 **Bacterial growth conditions**

411 All bacterial strains used are listed in Supplementary Table 2. Single colonies were used to  
412 inoculate 5 mL LB media before overnight culture at 37 °C and back dilution into LB or MEM-  
413 HEPES (T3SS-inducing conditions) to an OD<sub>600</sub> of 0.05 for specific assays or growth  
414 analysis. For sole carbon source experiments, overnight cultures were first washed three  
415 times in PBS to remove trace LB and used to inoculate M9 minimal media supplemented with  
416 a single carbon source (D-glucose, L-arabinose, D-ribose or D-xylose) at the concentrations  
417 indicated. All experiments were performed at 37 °C with shaking at 200 rpm. When necessary,  
418 antibiotics were used at the following concentrations: 100 µg/mL ampicillin, 50 µg/mL  
419 kanamycin, 20 µg/mL chloramphenicol, 100 µg/mL streptomycin and 50 µg/mL nalidixic acid.  
420 All chemicals and media were purchased from Merck or Thermo Fisher Scientific.

421

### 422 **Lambda red recombineering**

423 Non-polar single-gene deletions were generated using the Lambda Red recombineering  
424 system<sup>55</sup>. Briefly, the FRT-Kanamycin or FRT-Chloramphenicol cassette was amplified from  
425 pKD4 or pKD3 respectively, using primers containing 50 bp overhangs homologous to the  
426 regions directly up- and downstream regions of the gene of interest. Parental strains carrying  
427 pKD46 were cultured in SOB media (Ampicillin; 30 °C) containing 10 mM L-arabinose to an  
428 OD<sub>600</sub> of 0.4 before electroporation with 100 ng of the PCR product described above.  
429 Subsequent recovery was carried out in SOC media at 37 °C prior to plating the  
430 transformations on LB-agar containing the appropriate antibiotic for selection of  
431 recombinants. Positive mutants were identified by colony PCR and verified by Sanger  
432 sequencing. To remove the resistance cassette, positive mutants were subsequently

433 transformed with pCP20, plated on LB-agar containing Ampicillin and grown overnight at 30  
434 °C to induce FLP recombinase activity. Colonies were re-streaked non-selectively at 42 °C to  
435 cure the strains of pCP20. Plasmids used are listed in Supplementary Table 3. All primers used  
436 are listed in Supplementary Table 4.

437

#### 438 **Plasmid construction**

439 All complementation and reporter plasmids were generated by standard restriction enzyme  
440 cloning except for pSU-*araBADE*, which was generated using the NEBuilder® HiFi DNA  
441 Assembly Cloning kit as per the manufacturer's instructions. All plasmids generated are listed  
442 in Supplementary Table 3 and all primer sequences are listed in Supplementary Table 4. For  
443 reporter plasmids, promoter regions comprising of approximately 300 bp upstream of the  
444 gene of interest were PCR amplified from genomic DNA using primers containing EcoRI (5')  
445 and BamHI (3') restriction sites. PCR products were gel extracted, digested, phosphatase  
446 treated and ligated into pMK1*lux*. This resulted in a transcriptional reporter whereby the  
447 respective promoter for a gene of interest was fused to the *luxCDABE* operon from  
448 *Photorhabdus luminescens*. For complementation constructs, the gene/operon of interest  
449 was PCR amplified from genomic DNA using primers containing BamHI (5') and XbaI (3')  
450 restriction sites. PCR products were ligated into pSU-PROM or pACYC184. All restriction  
451 enzymes, Q5 high fidelity polymerase, Antarctic Phosphatase and T4 ligase were purchased  
452 from New England Biolabs. Cloning was confirmed by sequencing of plasmid inserts.

453

#### 454 **LUX-promoter fusion reporter assays**

455 Promoter activity was determined by measuring cell density (OD<sub>600</sub>) and absolute  
456 luminescence of cultures carrying LUX reporter fusions using a FLUOstar Omega microplate

457 reader (BMG Labtech). Relative luminescence units were calculated by dividing absolute  
458 luminescence values by the OD<sub>600</sub> at each given timepoint. Assays were performed as a time-  
459 course in 200 µL wells of white walled, clear flat-bottom, 96-well polystyrene microtiter  
460 plates. or taken as single measurements. Alternatively, endpoint luminescence  
461 measurements were taken from reporter strains grown in MEM-HEPES for 2 h before being  
462 spiked with the indicated sugar and grown for a further 5 h. Control cultures were spiked with  
463 the equivalent volume of sterile PBS. Individual culture volumes were inoculated with the  
464 strain of interest at a ratio of 1:100.

465

#### 466 **Secreted protein SDS-PAGE profiling**

467 T3SS-mediated protein secretion was profiled by culturing EHEC in 50 mL MEM-HEPES at  
468 37 °C to late exponential phase (OD<sub>600</sub> of 0.8-0.9). The cell-free supernatant was separated  
469 from the cellular fraction by centrifugation and filtration using a 0.4 µm filter. Total secreted  
470 protein was precipitated from the cell-free supernatant with 10% ice-cold trichloroacetic acid  
471 at 4 °C overnight. Secreted proteins were concentrated by centrifugation for 1 h at 4000 *g*.  
472 The supernatant was discarded, and pellets resuspended in 150 µL of 1 x lithium dodecyl  
473 sulphate buffer and boiled at 95 °C for 10 min. Samples were normalised by OD<sub>600</sub> at the point  
474 of harvesting. All protein samples were separated by SDS-PAGE using a 4-12 % Bis-Tris  
475 NuPAGE gel (Invitrogen) and running at 150 V for 90 min, before staining with Coomassie  
476 blue.

477

#### 478 **Immunoblot analysis**

479 Secreted protein fractions and corresponding whole-cell lysates (obtained by boiling the cell  
480 pellet in sample buffer as above) were used for immunoblot analysis. Samples were separated

481 by SDS-PAGE and were transferred from a 4-12 % Bis-Tris NuPAGE gel to a 0.45  $\mu$ M  
482 nitrocellulose membrane (GE Healthcare) using an XCell II Blot module (Invitrogen) at 30 V for  
483 90 mins. Membranes were then blocked with 5 % skim milk powder in PBS-Tween at room  
484 temperature for one hour before being incubated with primary antibodies for one hour.  
485 Membranes were washed three times in PBS-Tween for 10 minutes each before incubating  
486 for one hour with secondary antibodies. Primary antibodies used were anti-EspD (1:2500) and  
487 anti-GroEL (1:25000). Secondary antibodies used were anti-mouse and anti-rabbit HRP-  
488 conjugated (1:20000). Immunoblots were incubated with SuperSignal West Pico  
489 chemiluminescent substrate (Pierce) for five minutes before imaging using a G:Box Chemi  
490 system (Syngene).

#### 491 **HeLa cell adhesion assays and fluorescence microscopy**

492 For adhesion assays, HeLa cells were seeded onto sterile coverslips coated with rat tail  
493 collagen ( $10^4$  cells per coverslip in 12-well plates) in DMEM supplemented with 10 % foetal  
494 calf serum and 1 % Penicillin/Streptomycin. Cells were incubated overnight at 37 °C with 5 %  
495 CO<sub>2</sub>. Prior to infection, cells were washed twice with PBS and fresh MEM-HEPES supplemented  
496 with or without 5 mg/mL L-arabinose was added. A 40  $\mu$ L volume of MEM-HEPES containing  
497 EHEC grown to OD<sub>600</sub> 0.9 and back-diluted to 0.1 was added to each coverslip. Plates were  
498 centrifuged at 400 rpm for 3 min and incubated at 37 °C with 5 % CO<sub>2</sub> for two hours. Wells  
499 were then washed with fresh media and incubated for a further 3 hours. The wells were  
500 washed three times and fixed with 4 % paraformaldehyde for 15 minutes at room  
501 temperature. Wells were washed an additional two times and permeabilised with 0.1 % Triton  
502 X-100 for 5 minutes. The wells were washed twice more before incubation with ActinRed™  
503 555 ReadyProbes™ reagent (Rhodamine phalloidin; Invitrogen). Tissues were washed for a

504 final time and mounted onto glass slides using Fluoroshield™ with DAPI. All washes were  
505 done using sterile PBS. For all assays, EHEC transformed with an *rpsM*:GFP reporter plasmid  
506 were used. Slides were imaged using a Zeiss Axioimager at x40 magnification. Data were  
507 collected by imaging 20 random fields of view across three coverslips prepared on  
508 independent occasions.

509

### 510 **Animal experiments**

511 Strains of interest were used to mono- and co-infect BALB/C mice as previously described<sup>19</sup>.  
512 In brief, groups of five adult female mice (18-20 g) were inoculated by oral gavage using 200  
513  $\mu$ L of PBS suspension containing  $2 \times 10^9$  CFU of either a single strain or two strains mixed at a  
514 ratio of 1:1. For the analysis of bacterial colonisation, stool samples were aseptically  
515 recovered, weighed, and homogenised in PBS before being serially diluted. The number of  
516 CFU per gram of stool was determined by plating onto LB-agar with the appropriate antibiotic.  
517 Experiments were typically performed on two independent occasions and CFU counts were  
518 analysed using the Mann-Whitney *U*-test. For experiments involving *E. coli*, streptomycin  
519 resistant strains encoding an intact *Aau* locus were used and drinking water was  
520 supplemented with streptomycin (5 g/L) two-days prior to oral gavage and maintained for the  
521 duration of the experiment<sup>28</sup>. For experiments involving *C. rodentium*, animals were given  
522 normal drinking water.

523

### 524 **Ethics statement**

525 All animal experiments were performed in strict accordance with the United Kingdom Home  
526 Office Animals Scientific Procedures Act of 1986 under the personal project licence number  
527 PP8850146. The experiments were subject to local ethical approval and consideration given



528 to the refine, reduce and replace principals wherever possible so as all efforts were made to  
529 minimize animal suffering.

530

### 531 **RNA extraction**

532 EHEC cultures were mixed with 2 volumes of RNAprotect reagent (Qiagen), incubated at room  
533 temperature for 5 minutes and harvested by centrifugation. Total RNA extraction was done  
534 using a Monarch<sup>®</sup> Total RNA Miniprep Kit (New England Biolabs) prior to treatment with  
535 TURBO DNase (Ambion). DNA-free RNA samples were analyzed by Qubit (ThermoFisher  
536 Scientific) and assessed for degradation using agarose gel electrophoresis.

537

### 538 **Quantitative real time PCR (RT-qPCR)**

539 RNA samples were normalised, and cDNA synthesis performed using a LunaScript RT  
540 SuperMix kit (New England Biolabs). RT-qPCR was performed on the resulting cDNA using a  
541 LightCycler 96 Real-Time PCR system (Roche) and Luna Universal qPCR Master Mix kit (New  
542 England Biolabs). Reactions were performed as technical replicates within each of three  
543 biological replicates. All genes were normalised against the housekeeping gene, *groEL*. All  
544 primers used in RT-qPCR were checked for efficiency (90-110%) using standards made from  
545 template gDNA (100, 20, 4, 0.8 and 0.16 ng/ $\mu$ l). The data was analysed by the  $2^{-\Delta\Delta CT}$  method<sup>56</sup>.  
546 Primer sequences are listed in Supplementary Table 4

547

### 548 **RNA-sequencing and transcriptome analysis**

549 Ribosomal depletion and library assembly of DNA-free total RNA samples was carried out  
550 using an Illumina Ribo-Zero Tru-seq kit according to the manufacturer's specifications.  
551 Samples were processed by the Newcastle Genomics Core Facility. Sequencing was carried

552 out using a mid-range run on the Illumina Next-seq platform, generating 75-bp single-end  
553 reads. Raw read quality was checked using FastQC  
554 (<https://www.bioinformatics.babraham.ac.uk/projects/fastqc/>). To estimate transcript  
555 abundance, SALMON was used under the default parameters for the mapping of reads to the  
556 *E. coli* O157:H7 strain EDL933 reference sequence (Accession GCA\_000006665), retrieved  
557 from Ensembl. Transcript level counts outputted from SALMON were then summarised at the  
558 gene-level using tximport<sup>57</sup>. DESeq2 (v.1.28.1) was used to normalise RNA-seq count data and  
559 identify differentially expressed genes between conditions<sup>58</sup>. Differentially expressed genes  
560 displayed an absolute fold change of >1.5 and were a false discovery rate of 5 % (adjusted  $P$   
561 < 0.05). Volcano plots were generated in R studio using the enhanced volcano package  
562 (v.1.6.0). Functional enrichment and gene ontology analysis was performed using STRING to  
563 identify protein-protein interactions related to the differentially expressed genes identified  
564 using default parameters and excluding any disconnected nodes<sup>59</sup>.

565

#### 566 **L-arabinose quantification**

567 L-arabinose was quantified from homogenised and filtered luminal and colon tissue samples  
568 of BALB/c mice using an L-arabinose/D-galactose assay kit (Megazyme) as per the  
569 manufacturer's instructions.

570

#### 571 **Thin layer chromatography (TLC)**

572 Cell-free supernatants of EHEC cultured in MEM-HEPES alone or supplemented with L-  
573 arabinose were prepared by removing 1 mL of culture every hour, removing the supernatant  
574 by centrifugation and passing through a 0.2  $\mu$ M filter. Using TLC aluminium plates (Merck), 6  
575  $\mu$ L of sample for each time point was spotted 1 cm from the bottom and allowed to dry. The

576 plates were run in solvent (1-butanol:acetic acid:water at a ratio of 2:1:1), dried and sugars  
577 visualised by immersion in Orcinol stain.

578

### 579 **Gene carriage analysis**

580 To assess the frequency of carriage of the Z0415-9 locus and LEE island across the *E. coli*  
581 lineage, paired-end sequence read data for 1,067 strains previously described<sup>25</sup> were retrieved  
582 from the National Centre for Biotechnology Information (NCBI) Sequence Read Archive  
583 (accessed 16<sup>th</sup> September 2021), using the ‘prefetch’ and ‘fastq-dump’ tools within the SRA

584 Toolkit v2.9.0-mac64 (<http://ncbi.github.io/sra-tools>). FastQC v0.11.8  
585 (<http://www.bioinformatics.babraham.ac.uk/projects/fastqc/>) was used to generate quality

586 statistics for the paired-end reads, which were aggregated into a single report and visualised  
587 using MultiQC v1.11<sup>60</sup>. Kraken v2.0.8-beta was used to screen the raw Illumina sequencing  
588 data for contamination against the NCBI RefSeq Database<sup>61</sup>. Raw reads were filtered using  
589 Trimmomatic v0.36 by removing low-quality bases and read pairs together with Illumina  
590 adaptor sequences (settings: LEADING:3, TRAILING:3, MINLEN:36, SLIDINGWINDOW:4:15)<sup>62</sup>.

591 The complete chromosomes of the 56 genomes were used to simulate error free reads. This  
592 was done using the software package ART (version ART-MountRainier-2016-06-05) which  
593 simulated paired-end Illumina reads to 60x coverage with an insert size of  $340 \pm 40$  bp<sup>63</sup>. The  
594 average sequence coverage depth was estimated using the Burrows–Wheeler Aligner

595 (BWA) v0.7.15<sup>64</sup>; SAMtools v1.2<sup>65</sup>; Picard v2.7.1  
596 (<https://github.com/broadinstitute/picard>); the Genome Analysis Tool Kit v3.2-2

597 (GATK)<sup>66,67</sup>; BEDTools v2.18.2<sup>68</sup>; and SNPEff v4.1 as implemented in SPANDx v3.2<sup>69,70</sup>. In

598 brief, the quality-trimmed paired-end reads were mapped to the complete chromosome of  
599 strain EDL933 (GenBank: AE005174)<sup>15</sup>. Trimmed reads for the draft genomes were *de novo*

600 assembled using Shovill v1.0.4 (<https://github.com/tseemann/shovill>) (--gsiz 5M, --minlen  
601 200, --mincov 10, --opts "--sc"), which implements: Seqtk v1.3-r106  
602 (<https://github.com/lh3/seqtk>); Lighter v1.1.2<sup>71</sup>; FLASH v1.2.11<sup>72</sup>; SPAdes v3.13.1<sup>73</sup>; Samclip  
603 v0.2 (<https://github.com/tseemann/samclip>); SAMtools v1.8<sup>65</sup>; BWA-MEM v0.7.17-r1188<sup>64</sup>;  
604 and Pilon v1.22<sup>74</sup>. QUAST v4.5 was used to assess the *de novo* assembly metrics generated  
605 from Shovill by comparing each draft assembly to strain EDL933<sup>75</sup>. We identified and excluded  
606 the sequence data for certain strains from further analysis based on sequencing coverage  
607 being below 20-fold, the presence of contaminants, and the genome length from *de novo*  
608 assembly falling outside the upper (Q3) and lower (Q1) 1.5 x interquartile range (i.e., <  
609 4,095,491 bp or > 5,889,907 bp) ( $n=157$ ). To assess the publicly available strains for the  
610 presence of strain mixtures, paired-end reads were mapped onto the chromosome of EDL933  
611 using SPANDx to generate annotated single-nucleotide polymorphisms (SNPs) and insertions  
612 and deletions (INDELs) matrices. Heterozygous SNPs in each genome were identified from  
613 GATK UnifiedGenotyper VCF output. MLST v2.19.0 (<https://github.com/tseemann/mlst>) with  
614 default settings was used to characterise the multi-locus sequence type (MLST) of the  
615 remaining 949 strains ( $n=948$  excluding EDL933) against the *E. coli* MLST allelic profiles hosted  
616 on PubMLST<sup>76</sup>. High-resolution analysis of genetic variants was performed using SPANDx  
617 with EDL933 as a reference<sup>70</sup>. A maximum likelihood phylogenetic tree from the non-  
618 recombinant SNP alignment was generated using RAxML v8.2.10 (GTR-GAMMA correction)  
619 thorough optimisation of 10 distinct, randomized maximum parsimony trees<sup>77</sup>. The resulting  
620 phylogenetic tree was visualised using FigTree v1.4.4  
621 (<http://tree.bio.ed.ac.uk/software/figtree/>).

622

623 **Protein bioinformatics**

624 AlphaFold modelling was performed using AlphaFold version 2.1.1 implemented on the  
625 Monash University MASSIVE M3 computing cluster<sup>78,79</sup>. The amino acid sequences of the  
626 periplasmic binding protein (Z0415) (minus the predicted signal peptide), ATPase (Z0416-7)  
627 and two permease subunits (Z0418/Z0419) of Aau were provided and modelling was run in  
628 multimer mode, with a single molecule of each subunit requested. The quality of five ranked  
629 models produced by AlphaFold were assessed based on pLDDT score and compared for  
630 consistency with the top-ranked model used for further analysis and figure generation.

631

632 To identify ABC transporters closely related to Z0415-19, a phylogenetic analysis was  
633 conducted based on the associate amino acid sequence. The ABC\_tran\_pfam domain  
634 (pfam00005) was searched against EHEC EDL933 using the IMG/M server 'find function' tool.  
635 The returned hits were then filtered based on the predicted substrates to select only those  
636 predicted to transport sugar substates. The amino acid sequences were then exported and  
637 aligned in MEGAX (V 10.1.8) using MUSCLE<sup>80</sup>. The evolutionary history was inferred by using  
638 the Maximum Likelihood method and Le\_Gascuel\_2008 model. The tree with the highest log  
639 likelihood (-11697.05) is shown. The percentage of trees in which the associated taxa  
640 clustered together is shown next to the branches. Initial tree(s) for the heuristic search were  
641 obtained automatically by applying Neighbor-Join and BioNJ algorithms to a matrix of  
642 pairwise distances estimated using the JTT model, and then selecting the topology with  
643 superior log likelihood value. A discrete Gamma distribution was used to model evolutionary  
644 rate differences among sites (5 categories (+G, parameter = 1.6636)). The tree is drawn to  
645 scale, with branch lengths measured in the number of substitutions per site. This analysis

646 involved 12 amino acid sequences. There were a total of 546 positions in the final dataset.

647 Evolutionary analyses were conducted in MEGA X<sup>81</sup>.

## 648 **Statistical analyses**

649 Graphs were generated and statistical analyses were performed using GraphPad Prism

650 version 8. Test details for each experiment can be found within the associated figure legends.

651 The student's *t*-test was used for comparing two groups with normally distributed data and

652 equal variance. The Mann-Whitney U test was used to compare two groups that were not

653 normally distributed and had unequal variance (mono-infections). The Wilcoxon signed-rank

654 test was used to compare matched samples (co-infections or co-colonisations). The Fisher's

655 exact test was used in the analysis of Odd's ratio contingency tables. *P*-values of less than or

656 equal to 0.05 were considered statistically significant.

657 **References**

- 658 1. Caballero-Flores, G., Pickard, J. M. & Núñez, G. Microbiota-mediated colonization  
659 resistance: mechanisms and regulation. *Nature Reviews Microbiology* **21**, 347–360  
660 (2023).
- 661 2. Bäumlér, A. J. & Sperandio, V. Interactions between the microbiota and pathogenic  
662 bacteria in the gut. *Nature* **535**, 85–93 (2016).
- 663 3. Connolly, J. P. R., Brett Finlay, B. & Roe, A. J. From ingestion to colonization: The  
664 influence of the host environment on regulation of the LEE encoded type III secretion  
665 system in enterohaemorrhagic *Escherichia coli*. *Frontiers in Microbiology* **6**, 568 (2015).
- 666 4. Turner, N. C. A., Connolly, J. P. R. & Roe, A. J. Control freaks—signals and cues governing  
667 the regulation of virulence in attaching and effacing pathogens. *Biochemical Society*  
668 *Transactions* **47**, 229–238 (2018).
- 669 5. Wale, K. R., Cottam, C., Connolly, J. P. & Roe, A. J. Transcriptional and metabolic  
670 regulation of EHEC and *Citrobacter rodentium* pathogenesis. *Current Opinion in*  
671 *Microbiology* **63**, 70–75 (2021).
- 672 6. Kaper, J. B., Nataro, J. P. & Mobley, H. L. Pathogenic *Escherichia coli*. *Nat. Rev.*  
673 *Microbiol.* **2**, 123–40 (2004).
- 674 7. Croxen, M. A. & Finlay, B. B. Molecular mechanisms of *Escherichia coli* pathogenicity.  
675 *Nature Reviews Microbiology* **8**, 26–38 (2010).
- 676 8. Moon, H. W., Whipp, S. C., Argenzio, R. A., Levine, M. M. & Giannella, R. A. Attaching  
677 and effacing activities of rabbit and human enteropathogenic *Escherichia coli* in pig and  
678 rabbit intestines. *Infect. Immun.* **41**, 1340–1351 (1983).
- 679 9. Kenny, B. *et al.* Enteropathogenic *E. coli* (EPEC) transfers its receptor for intimate  
680 adherence into mammalian cells. *Cell* **91**, 511–520 (1997).

- 681 10. Jerse, A. E., Yu, J., Tall, B. D. & Kaper, J. B. A genetic locus of enteropathogenic  
682 *Escherichia coli* necessary for the production of attaching and effacing lesions on tissue  
683 culture cells. *Proc. Natl. Acad. Sci. U. S. A.* **87**, 7839–7843 (1990).
- 684 11. Mcdaniel, T. K., Jarvis, K. G., Donnenberg, M. S. & Kaper, J. B. A genetic locus of  
685 enterocyte effacement conserved among diverse enterobacterial pathogens. *Proc.*  
686 *Natl. Acad. Sci. U. S. A.* **92**, 1664–1668 (1995).
- 687 12. Deng, W. *et al.* Dissecting virulence: Systematic and functional analyses of a  
688 pathogenicity island. *Proc. Natl. Acad. Sci. U. S. A.* **101**, 3597–3602 (2004).
- 689 13. Dean, P. & Kenny, B. The effector repertoire of enteropathogenic *E. coli*: ganging up on  
690 the host cell. *Current Opinion in Microbiology* **12**, 101–109 (2009).
- 691 14. Tobe, T. *et al.* An extensive repertoire of type III secretion effectors in *Escherichia coli*  
692 O157 and the role of lambdoid phages in their dissemination. *Proc. Natl. Acad. Sci. U.*  
693 *S. A.* **103**, 14941–14946 (2006).
- 694 15. Perna, N. T. *et al.* Genome sequence of enterohaemorrhagic *Escherichia coli* O157:H7.  
695 *Nature* **409**, 529–533 (2001).
- 696 16. Wong, A. R. C. *et al.* Enteropathogenic and enterohaemorrhagic *Escherichia coli*: Even  
697 more subversive elements. *Molecular Microbiology* **80**, 1420–1438 (2011).
- 698 17. Collins, J. W. *et al.* *Citrobacter rodentium*: Infection, inflammation and the microbiota.  
699 *Nature Reviews Microbiology* **12**, 612–623 (2014).
- 700 18. Mullineaux-Sanders, C. *et al.* *Citrobacter rodentium*–host–microbiota interactions:  
701 immunity, bioenergetics and metabolism. *Nature Reviews Microbiology* **17**, 701–715  
702 (2019).
- 703 19. Crepin, V. F., Collins, J. W., Habibzay, M. & Frankel, G. *Citrobacter rodentium* mouse  
704 model of bacterial infection. *Nat. Protoc.* **11**, 1851–1876 (2016).



- 705 20. Kamada, N. *et al.* Regulated virulence controls the ability of a pathogen to compete  
706 with the gut microbiota. *Science* **336**, 1325–1329 (2012).
- 707 21. Connolly, J. P. R. *et al.* Host-associated niche metabolism controls enteric infection  
708 through fine-tuning the regulation of type 3 secretion. *Nat. Commun.* **9**, 4187 (2018).
- 709 22. Njoroge, J. W., Nguyen, Y., Curtis, M. M., Moreira, C. G. & Sperandio, V. Virulence meets  
710 metabolism: Cra and KdpE gene regulation in enterohemorrhagic *Escherichia coli*. *MBio*  
711 **3**, e00280-00212 (2012).
- 712 23. Curtis, M. M. *et al.* The gut commensal *Bacteroides thetaiotaomicron* exacerbates  
713 enteric infection through modification of the metabolic landscape. *Cell Host Microbe*  
714 **16**, 759–769 (2014).
- 715 24. Menezes-Garcia, Z., Kumar, A., Zhu, W., Winter, S. E. & Sperandio, V. L-Arginine sensing  
716 regulates virulence gene expression and disease progression in enteric pathogens.  
717 *Proc. Natl. Acad. Sci. U. S. A.* **117**, 12387–12393 (2020).
- 718 25. Connolly, J. P. R. *et al.* The host metabolite D-serine contributes to bacterial niche  
719 specificity through gene selection. *ISME J.* **9**, 1039–1051 (2015).
- 720 26. O’Boyle, N., Connolly, J. P. R., Tucker, N. P. & Roe, A. J. Genomic plasticity of pathogenic  
721 *Escherichia coli* mediates D-serine tolerance via multiple adaptive mechanisms. *Proc.*  
722 *Natl. Acad. Sci. U. S. A.* **117**, 22484–22493 (2020).
- 723 27. Conway, T. & Cohen, P. S. Commensal and Pathogenic *Escherichia coli* Metabolism in  
724 the Gut. *Microbiol. Spectr.* **3** MBP-0006-2014 (2015).
- 725 28. Fabich, A. J. *et al.* Comparison of carbon nutrition for pathogenic and commensal  
726 *Escherichia coli* strains in the mouse intestine. *Infect. Immun.* **76**, 1143–1152 (2008).
- 727 29. Crozier, L. *et al.* The role of L-arabinose metabolism for *Escherichia coli* o157:H7 in  
728 edible plants. *Microbiol. (United Kingdom)* **167**, 1-12 (2021).

- 729 30. Mayer, C. & Boos, W. Hexose/Pentose and Hexitol/Pentitol Metabolism. *EcoSal Plus* **1**  
730 10.1128/ecosalplus.3.4.1 (2005).
- 731 31. Rice, A. J., Park, A. & Pinkett, H. W. Diversity in ABC transporters: Type I, II and III  
732 importers. *Critical Reviews in Biochemistry and Molecular Biology* **49**, 426–437 (2014).
- 733 32. Zschiedrich, C. P., Keidel, V. & Szurmant, H. Molecular Mechanisms of Two-Component  
734 Signal Transduction. *Journal of Molecular Biology* **428**, 3752–3775 (2016).
- 735 33. Schleif, R. AraC protein, regulation of the L-arabinose operon in *Escherichia coli*, and  
736 the light switch mechanism of AraC action. *FEMS Microbiology Reviews* **34**, 779–796  
737 (2010).
- 738 34. Carlson-Banning, K. M. & Sperandio, V. Catabolite and oxygen regulation of  
739 enterohemorrhagic *Escherichia coli* virulence. *MBio* **7**, e01852-16 (2016).
- 740 35. Mullineaux-Sanders, C. *et al.* Citrobacter rodentium Relies on Commensals for  
741 Colonization of the Colonic Mucosa. *Cell Rep.* **21**, 3381–3389 (2017).
- 742 36. Freter, R., Brickner, H., Fekete, J., Vickerman, M. M. & Carey, K. E. Survival and  
743 implantation of *Escherichia coli* in the intestinal tract. *Infect. Immun.* **39**, 686–703  
744 (1983).
- 745 37. Yip, A. Y. G. *et al.* Antibiotics promote intestinal growth of carbapenem-resistant  
746 Enterobacteriaceae by enriching nutrients and depleting microbial metabolites. *Nat.*  
747 *Commun.* **14**, 5094 (2023).
- 748 38. Liu, B. *et al.* Enterohaemorrhagic *E. coli* utilizes host- and microbiota-derived L-malate  
749 as a signaling molecule for intestinal colonization. *Nat. Commun.* **14**, 7227 (2023).
- 750 39. Schutte, J. B., de Jong, J., van Weerden, E. J. & Tamminga, S. Nutritional implications of  
751 L-arabinose in pigs. *Br. J. Nutr.* **68**, 195–207 (1992).
- 752 40. Schwalm, N. D., Townsend, G. E. & Groisman, E. A. Multiple signals govern utilization

- 753 of a polysaccharide in the gut bacterium *Bacteroides thetaiotaomicron*. *MBio* **7**,  
754 10.1128/mbio.01342-16 (2016).
- 755 41. Pereira, G. V. *et al.* Degradation of complex arabinoxylans by human colonic  
756 Bacteroidetes. *Nat. Commun.* **12**, 459 (2021).
- 757 42. Martens, E. C. *et al.* Recognition and degradation of plant cell wall polysaccharides by  
758 two human gut symbionts. *PLoS Biol.* **9**, e1001221 (2011).
- 759 43. Rogowski, A. *et al.* Glycan complexity dictates microbial resource allocation in the large  
760 intestine. *Nat. Commun.* **6**, 7481 (2015).
- 761 44. Kyle, J. L., Parker, C. T., Goudeau, D. & Brandl, M. T. Transcriptome analysis of  
762 *Escherichia coli* O157:H7 exposed to lysates of lettuce leaves. *Appl. Environ. Microbiol.*  
763 **76**, 1375–1387 (2010).
- 764 45. John, M. *et al.* Use of in vivo-induced antigen technology for identification of  
765 *Escherichia coli* O157:H7 proteins expressed during human infection. *Infect. Immun.*  
766 **73**, 2665–2679 (2005).
- 767 46. Petty, N. K. *et al.* The *Citrobacter rodentium* genome sequence reveals convergent  
768 evolution with human pathogenic *Escherichia coli*. *J. Bacteriol.* **192**, 525–538 (2010).
- 769 47. Harper, L. *et al.* *Staphylococcus aureus* responds to the central metabolite pyruvate to  
770 regulate virulence. *MBio* **9**, 10.1128/mbio.02272-17 (2018).
- 771 48. Jiang, L. *et al.* *Salmonella* Typhimurium reprograms macrophage metabolism via T3SS  
772 effector SopE2 to promote intracellular replication and virulence. *Nat. Commun.* **12**,  
773 879 (2021).
- 774 49. Wiebe, M. A. *et al.* Serine Deamination Is a New Acid Tolerance Mechanism Observed  
775 in Uropathogenic *Escherichia coli*. *MBio* **13**, e02963-22 (2022).
- 776 50. Ruddle, S. J., Massis, L. M., Cutter, A. C. & Monack, D. M. *Salmonella*-liberated dietary

- 777 L-arabinose promotes expansion in superspreaders. *Cell Host Microbe* **31**, 405-417  
778 (2023).
- 779 51. Neumann, M. *et al.* Deprivation of dietary fiber in specific-pathogen-free mice  
780 promotes susceptibility to the intestinal mucosal pathogen *Citrobacter rodentium*. *Gut*  
781 *Microbes* **13**, 1949-0976 (2021).
- 782 52. Desai, M. S. *et al.* A Dietary Fiber-Deprived Gut Microbiota Degrades the Colonic Mucus  
783 Barrier and Enhances Pathogen Susceptibility. *Cell* **167**, 1339-1353 (2016).
- 784 53. An, J. *et al.* Western-style diet impedes colonization and clearance of *Citrobacter*  
785 *rodentium*. *PLoS Pathog.* **17**, e1009497 (2021).
- 786 54. Jimenez, A. G., Ellermann, M., Abbott, W. & Sperandio, V. Diet-derived galacturonic  
787 acid regulates virulence and intestinal colonization in enterohaemorrhagic *Escherichia*  
788 *coli* and *Citrobacter rodentium*. *Nat. Microbiol.* **5**, 368–378 (2020).
- 789 55. Datsenko, K. A. & Wanner, B. L. One-step inactivation of chromosomal genes in  
790 *Escherichia coli* K-12 using PCR products. *Proc. Natl. Acad. Sci. U. S. A.* **97**, 6640–6645  
791 (2000).
- 792 56. Livak, K. J. & Schmittgen, T. D. Analysis of relative gene expression data using real-time  
793 quantitative PCR and the 2- $\Delta\Delta$ CT method. *Methods* **25**, 402–408 (2001).
- 794 57. Patro, R., Duggal, G., Love, M. I., Irizarry, R. A. & Kingsford, C. Salmon provides fast and  
795 bias-aware quantification of transcript expression. *Nat. Methods* **14**, 417–419 (2017).
- 796 58. Love, M. I., Huber, W. & Anders, S. Moderated estimation of fold change and dispersion  
797 for RNA-seq data with DESeq2. *Genome Biol.* **15**, 550 (2014).
- 798 59. Szklarczyk, D. *et al.* The STRING database in 2021: Customizable protein-protein  
799 networks, and functional characterization of user-uploaded gene/measurement sets.  
800 *Nucleic Acids Res.* **49**, D605–D612 (2021).

- 801 60. Ewels, P., Magnusson, M., Lundin, S. & Källér, M. MultiQC: Summarize analysis results  
802 for multiple tools and samples in a single report. *Bioinformatics* **32**, 3047–3048 (2016).
- 803 61. Wood, D. E. & Salzberg, S. L. Kraken: Ultrafast metagenomic sequence classification  
804 using exact alignments. *Genome Biol.* **15**, R46 (2014).
- 805 62. Bolger, A. M., Lohse, M. & Usadel, B. Trimmomatic: A flexible trimmer for Illumina  
806 sequence data. *Bioinformatics* **30**, 2114–2120 (2014).
- 807 63. Huang, W., Li, L., Myers, J. R. & Marth, G. T. ART: A next-generation sequencing read  
808 simulator. *Bioinformatics* **28**, 593–594 (2012).
- 809 64. Li, H. & Durbin, R. Fast and accurate short read alignment with Burrows-Wheeler  
810 transform. *Bioinformatics* **25**, 1754–1760 (2009).
- 811 65. Li, H. *et al.* The Sequence Alignment/Map format and SAMtools. *Bioinformatics* **25**,  
812 2078–2079 (2009).
- 813 66. McKenna, A. *et al.* The genome analysis toolkit: A MapReduce framework for analyzing  
814 next-generation DNA sequencing data. *Genome Res.* **20**, 1297–1303 (2010).
- 815 67. Depristo, M. A. *et al.* A framework for variation discovery and genotyping using next-  
816 generation DNA sequencing data. *Nat. Genet.* **43**, 491–501 (2011).
- 817 68. Quinlan, A. R. & Hall, I. M. BEDTools: A flexible suite of utilities for comparing genomic  
818 features. *Bioinformatics* **26**, 841–842 (2010).
- 819 69. Cingolani, P. *et al.* A program for annotating and predicting the effects of single  
820 nucleotide polymorphisms, SnpEff: SNPs in the genome of *Drosophila melanogaster*  
821 strain w1118; iso-2; iso-3. *Fly (Austin)*. **6**, 80–92 (2012).
- 822 70. Sarovich, D. S. & Price, E. P. SPANDx: A genomics pipeline for comparative analysis of  
823 large haploid whole genome re-sequencing datasets. *BMC Res. Notes* **7**, (2014).
- 824 71. Song, L., Florea, L. & Langmead, B. Lighter: fast and memory-efficient sequencing error

- 825 correction without counting. *Genome Biol.* **15**, 509 (2014).
- 826 72. Magoč, T. & Salzberg, S. L. FLASH: Fast length adjustment of short reads to improve  
827 genome assemblies. *Bioinformatics* **27**, 2957–2963 (2011).
- 828 73. Bankevich, A. *et al.* SPAdes: A new genome assembly algorithm and its applications to  
829 single-cell sequencing. *J. Comput. Biol.* **19**, 455–477 (2012).
- 830 74. Walker, B. J. *et al.* Pilon: An integrated tool for comprehensive microbial variant  
831 detection and genome assembly improvement. *PLoS One* **9**, e112963 (2014).
- 832 75. Gurevich, A., Saveliev, V., Vyahhi, N. & Tesler, G. QUAST: Quality assessment tool for  
833 genome assemblies. *Bioinformatics* **29**, 1072–1075 (2013).
- 834 76. Larsen, M. V. *et al.* Multilocus sequence typing of total-genome-sequenced bacteria. *J.*  
835 *Clin. Microbiol.* **50**, 1355–1361 (2012).
- 836 77. Stamatakis, A. RAxML version 8: A tool for phylogenetic analysis and post-analysis of  
837 large phylogenies. *Bioinformatics* **30**, 1312–1313 (2014).
- 838 78. Jumper, J. *et al.* Highly accurate protein structure prediction with AlphaFold. *Nature*  
839 **596**, 583–589 (2021).
- 840 79. Evans, R. *et al.* Protein complex prediction with AlphaFold-Multimer. *bioRxiv*  
841 2021.10.04.463034 (2022).
- 842 80. Edgar, R. C. MUSCLE: Multiple sequence alignment with high accuracy and high  
843 throughput. *Nucleic Acids Res.* **32**, 1792–1797 (2004).
- 844 81. Kumar, S., Stecher, G., Li, M., Knyaz, C. & Tamura, K. MEGA X: Molecular evolutionary  
845 genetics analysis across computing platforms. *Mol. Biol. Evol.* **35**, 1547–1549 (2018).

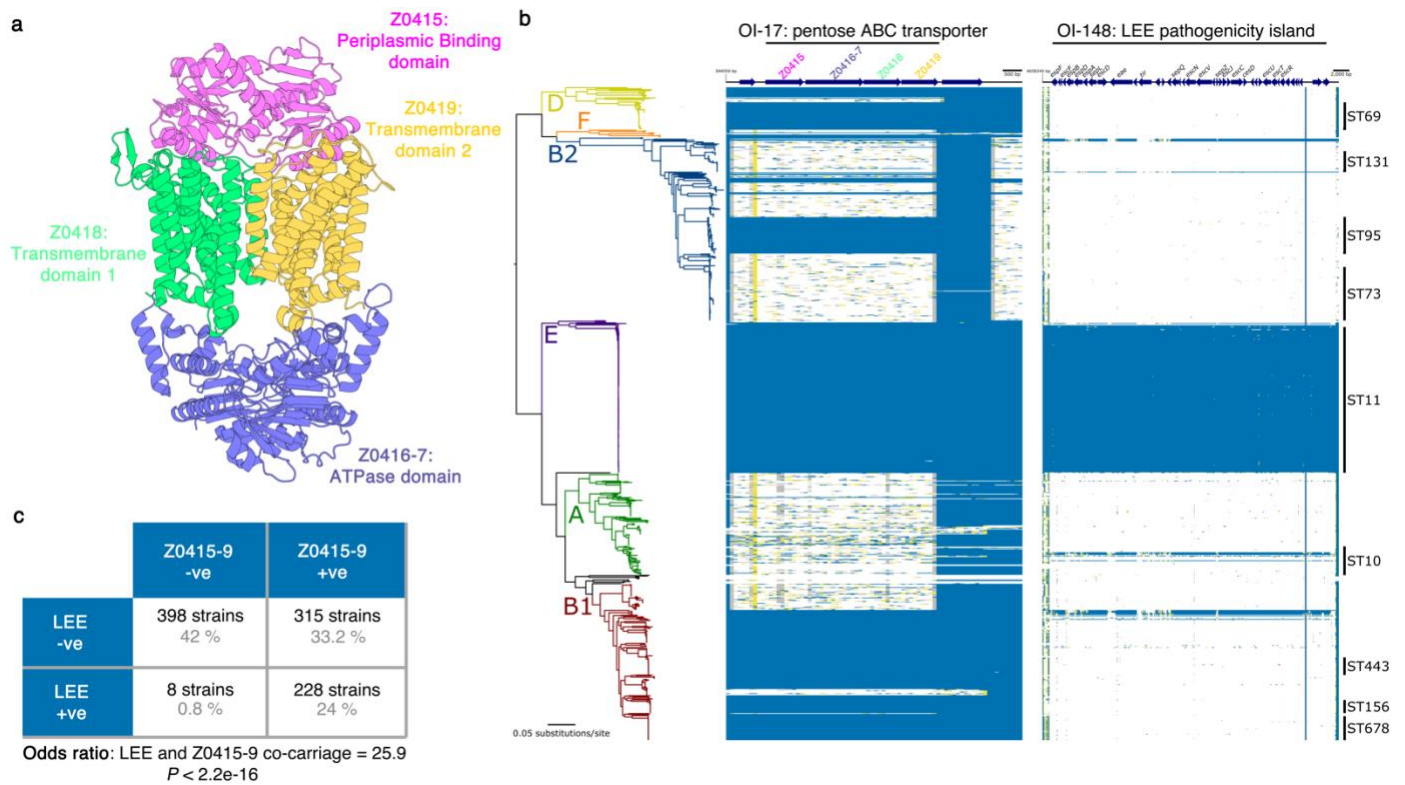

846 **Fig. 1. A horizontally acquired pentose sugar ABC transporter widely encoded by enteric**  
 847 **EHEC strains.** **a**, AlphaFold2 model of the predicted Z0415-9 structure assembled at the EHEC  
 848 inner membrane. **b**, Maximum likelihood analysis depicting the core-genome phylogeny of  
 849 949 *E. coli* isolates built from 245,518 core-genome single-nucleotide polymorphisms called  
 850 against the reference strains chromosome EDL933. Phylogeny is rooted according to the actual root  
 851 by *Escherichia fergusonii* ATCC 35469, which has been omitted for visualisation. Branch  
 852 colours indicate the six main phylogenetic groups. Branch lengths and scale bar represent  
 853 number of nucleotide substitutions per site. The presence/absence of Z0415-9 or the LEE is  
 854 based on the uniform coverage at each 100 bp window size. Coverage is shown as a heat map  
 855 where  $\geq 80\%$  identity is highlighted in blue,  $\geq 50\%$  identity is highlighted in yellow, and  $\geq 1\%$  is  
 856 highlighted in grey. White plots indicate absent regions. **c**, 2 x 2 contingency matrix for carriage  
 857 of the LEE and Z0415-9, based on the 949 genomes analysed in panel **b**. A '+ve' indicates  
 858 presence whereas a '-ve' indicates absence. The number of strains for each scenario and the

859 percentage distribution is given in black and grey respectively. Statistical significance of the

860 associated odd's ratio was calculated using a Fisher's exact test.

861



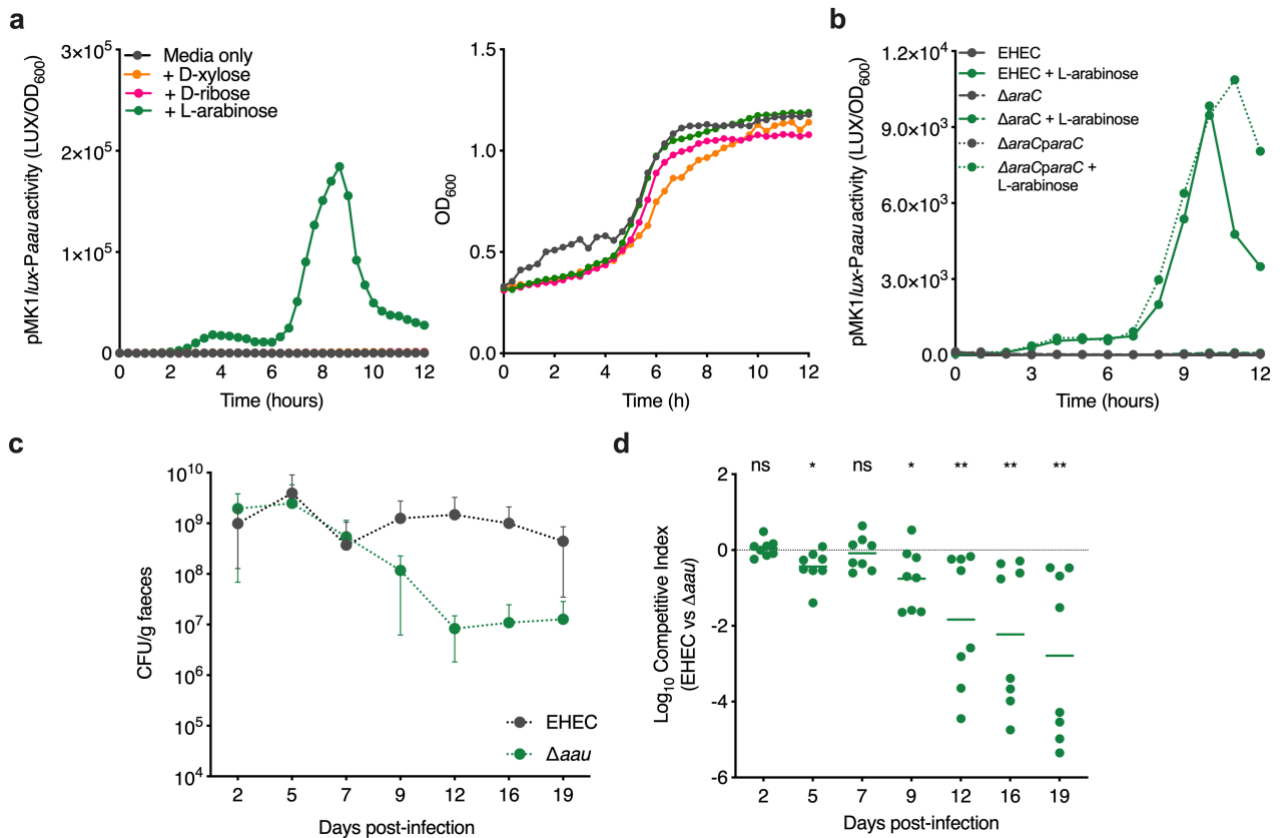

862 **Fig. 2. Aau is induced by L-arabinose and required for EHEC fitness in the mouse gut. a,**  
 863 Transcriptional reporter assay of EHEC transformed with pMK1lux-Paau cultured in MEM-  
 864 HEPES alone or supplemented with 0.5 mg/ml of the indicated sugar. Data are depicted as  
 865 luminescence units (LUX) divided by optical density (OD<sub>600</sub>) of the culture at each timepoint.  
 866 The growth curve in the right panel was generated from the associated OD<sub>600</sub> values. **b,**  
 867 pMK1lux-Paau reporter assay as described in panel a utilising wild type (WT) EHEC, ΔaraC and  
 868 ΔaraC + paraC derivative strains grown in MEM-HEPES alone or supplemented with L-  
 869 arabinose. Graphs in panels a and b are representative of three independent repeats. **c,**  
 870 Faecal shedding dynamics of Streptomycin-treated BALB/c mice (n = 8) colonised with a 1:1  
 871 mixture of EHEC and Δaau. Error bars represent the standard deviation. **d,** Competitive index  
 872 of EHEC versus Δaau during colonisation of Streptomycin-treated BALB/c mice. Data points  
 873 indicate the fold-decrease in Δaau CFU recovered per faecal sample in comparison to wild

874 type EHEC. Statistical significance was determined by Wilcoxon signed-rank test. \*, \*\* and

875 ns indicate  $P < 0.05$ ,  $P < 0.01$  or not significant respectively.

876

877

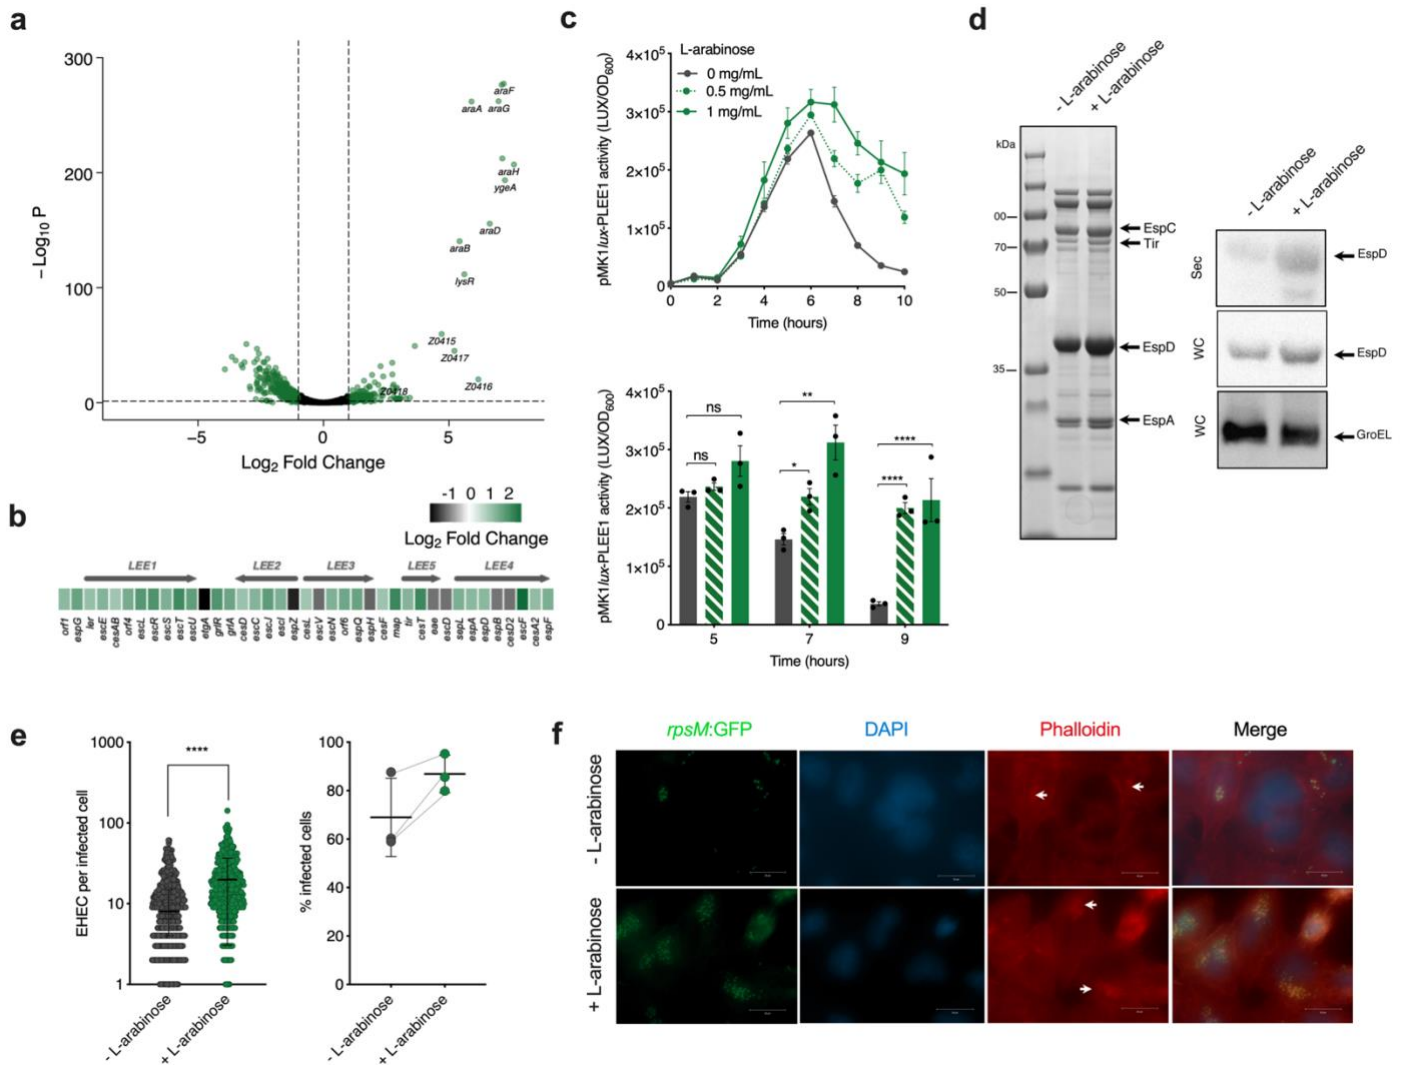

878 **Figure 3. L-arabinose enhances expression and function of the LEE-encoded T3SS.** **a**, Volcano  
 879 plot depicting gene expression patterns of EHEC cultured in MEM-HEPES supplemented with  
 880 L-arabinose relative to media alone as determined by RNA-seq. Significantly differentially  
 881 expressed genes (FDR-corrected  $P \leq 0.05$ ) are highlighted in green with select genes related  
 882 to L-arabinose utilisation labelled. **b**, Expression profile of genes from the LEE island derived  
 883 from RNA-seq data presented in panel **a**. The scale bar indicates the  $\text{Log}_2$  fold-change in  
 884 expression of genes from EHEC cells in response to L-arabinose supplementation. **c**,  
 885 Transcriptional reporter assay of EHEC transformed with pMK1/lux-PLLEE1 cultured in MEM-  
 886 HEPES alone or supplemented with 0.5 or 1 mg/ml of L-arabinose. Data are depicted as  
 887 luminescence units (LUX) divided by optical density (OD<sub>600</sub>) of the culture at each timepoint.

888 The bar chart below indicates statistical significance at selected timepoints as determined  
889 using a students' *t*-test. \*, \*\*, \*\*\*\* and ns indicate  $P < 0.05$ ,  $P < 0.01$ ,  $P < 0.0001$  or not  
890 significant respectively. Error bars represent standard error of the mean. **d**, SDS-PAGE  
891 analysis of secreted proteins identified from cell-free supernatant of EHEC culture in  
892 MEM-HEPES alone or supplemented with L-arabinose. The identity of known T3SS  
893 associate effector proteins is labelled with arrows. Corresponding immunoblot analysis of  
894 EspD (LEE-encoded) or GroEL levels identified in secreted fractions (Sec) in the cell-free  
895 supernatant or whole cell pellet (WC). Data is representative of three independent  
896 repeats. **e**, Data derived from widefield fluorescence microscopy analysis of HeLa cells  
897 infected with EHEC cultured in MEM-HEPES alone ( $n = 531$ ) or supplemented with L-  
898 arabinose ( $n = 522$ ). Quantification of the number of EHEC lesions per infected HeLa cell  
899 was determined from 20 random fields of view. Experiments were performed on three  
900 independent occasions. Statistical significance was determined using a Mann-Whitney U  
901 test. \*\*\*\* indicates  $P < 0.0001$ . The graph on the right shows the average percentage of  
902 infected HeLa cells determined from three independent experiments. Error bars represent  
903 standard deviation. **f**, Representative images of HeLa cells infected with EHEC cultured  
904 with and without L-arabinose. Channels are colour coded and labelled to indicate each  
905 portion of the merged image. The white arrows indicate the presence of A/E lesions as  
906 identified by areas of condensed actin that co-localise with attached EHEC cells.

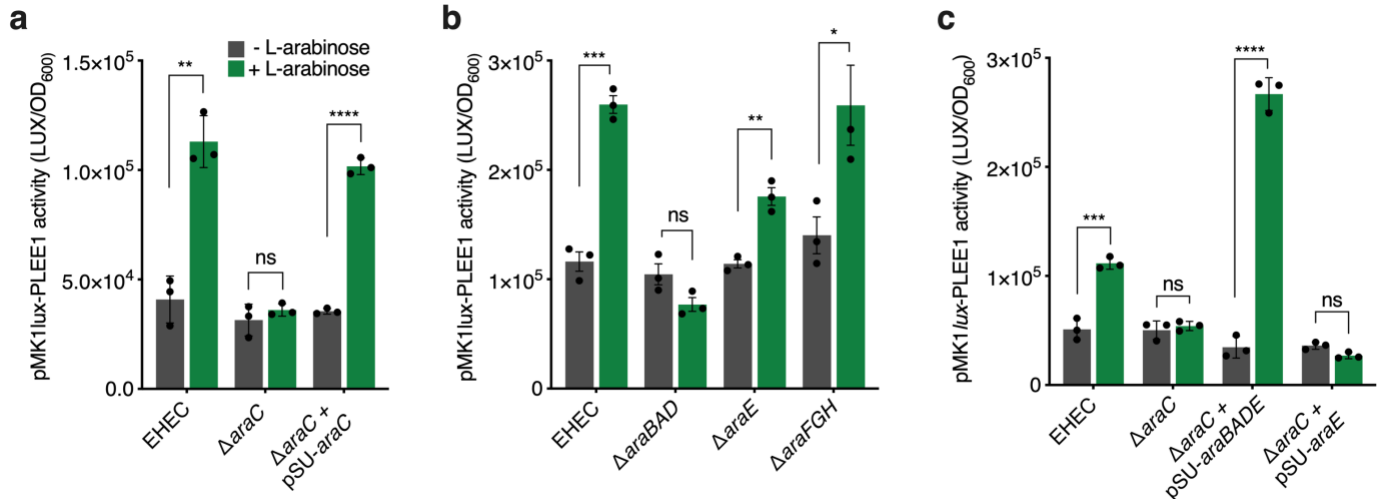

907 **Figure 4. L-arabinose metabolism is required to enhance T3SS expression.** **a**, Transcriptional  
 908 reporter assay of wild type EHEC,  $\Delta araC$  and  $\Delta araC$  + pSU $araC$  transformed with pMK1/*lux*-  
 909 PLEE1 cultured in MEM-HEPES alone or supplemented with L-arabinose. Data are depicted as  
 910 luminescence units (LUX) divided by optical density (OD<sub>600</sub>) of the sample. All samples were  
 911 taken at the same point in growth (hour 7). **b**, pMK1/*lux*-PLEE1 reporter assays performed in  
 912 the EHEC,  $\Delta araBAD$ ,  $\Delta araE$  and  $\Delta araFGH$  backgrounds. **c**, pMK1/*lux*-PLEE1 reporter assays  
 913 performed in the EHEC and  $\Delta araC$  backgrounds. For complementation,  $\Delta araC$  was  
 914 transformed with either pSU-*araBADE* or pSU-*araE*. \*, \*\*, \*\*\*, \*\*\*\* and ns indicate  $P <$   
 915 0.05,  $P <$  0.01,  $P <$  0.001,  $P <$  0.0001 or not significant respectively. Statistical significance  
 916 was determined using a student's *t*-test. Error bars represent standard error of the mean.  
 917

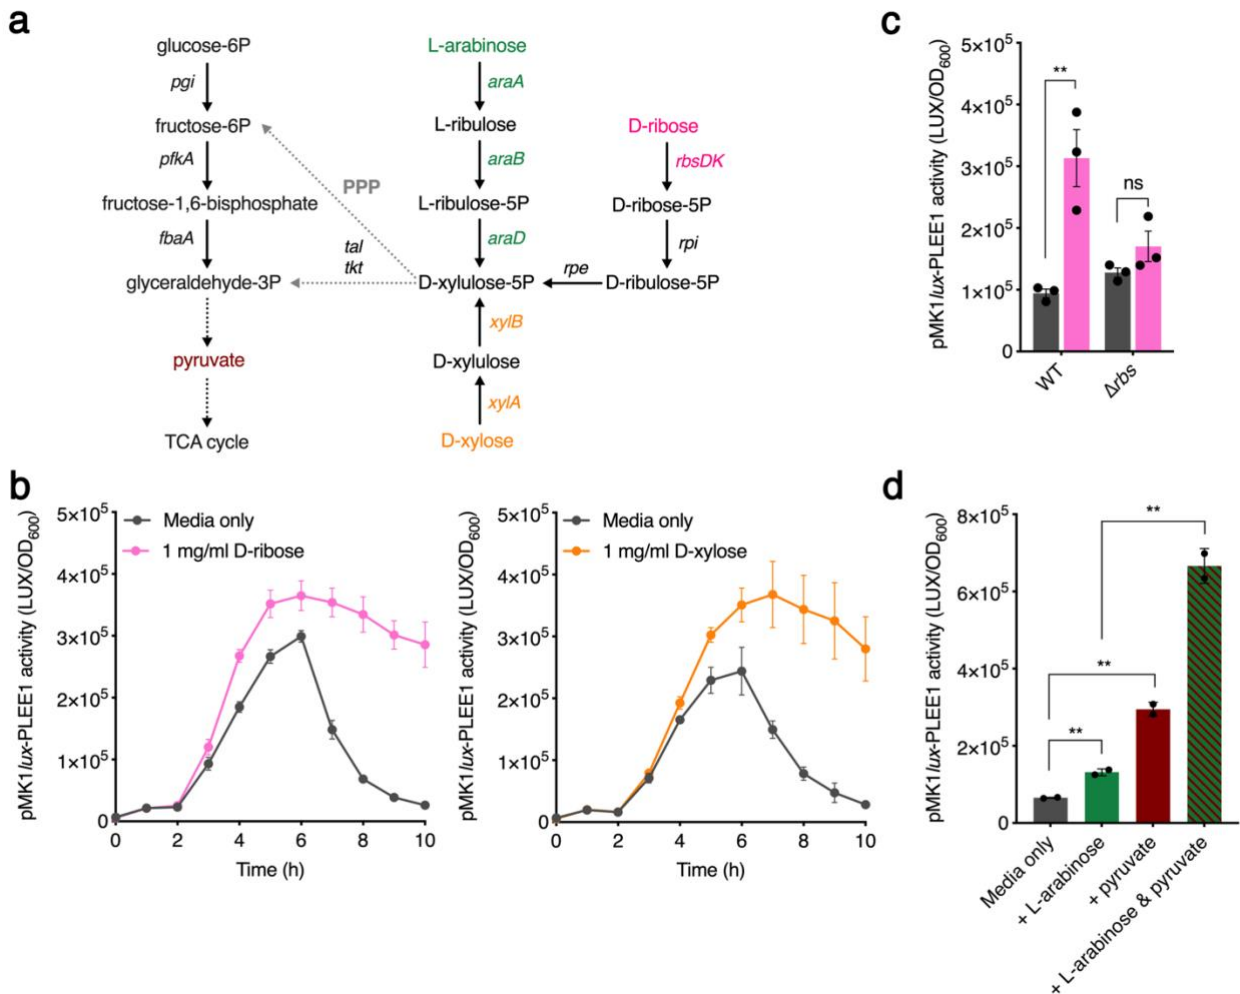

918 **Figure 5. A generalised mechanism for T3SS regulation by pentose sugar metabolism. a,**  
 919 Schematic illustrating where the L-arabinose, D-xylose and D-ribose metabolic pathways  
 920 converge with glycolysis (left hand side) via the Pentose Phosphate Pathway (PPP). The genes  
 921 involved at each conversion are illustrated. Single steps are depicted as a solid arrow. Multiple  
 922 steps are abbreviated to dotted arrows. **b,** Transcriptional reporter assay of EHEC  
 923 transformed with pMK1/*lux*-PLEE1 cultured in MEM-HEPES alone or supplemented with 1  
 924 mg/ml of D-ribose or D-xylose. Data are depicted as luminescence units (LUX) divided by  
 925 optical density (OD<sub>600</sub>) of the culture at each timepoint. **c,** pMK1/*lux*-PLEE1 reporter assay of  
 926 WT EHEC and the  $\Delta$ *rbs* mutant cultured in MEM-HEPES alone (grey) or supplemented with D-  
 927 ribose (pink). **d,** pMK1/*lux*-PLEE1 reporter assay of WT EHEC cultured in MEM-HEPES alone or  
 928 supplemented with 1 mg/ml L-arabinose, 0.2 % pyruvate or a mixture of both. For panels c

929 and **d**, \*\* and ns indicate  $P < 0.01$  or not significant respectively. Statistical significance  
930 was determined using a student's  $t$ -test. Error bars represent standard error of the mean.  
931

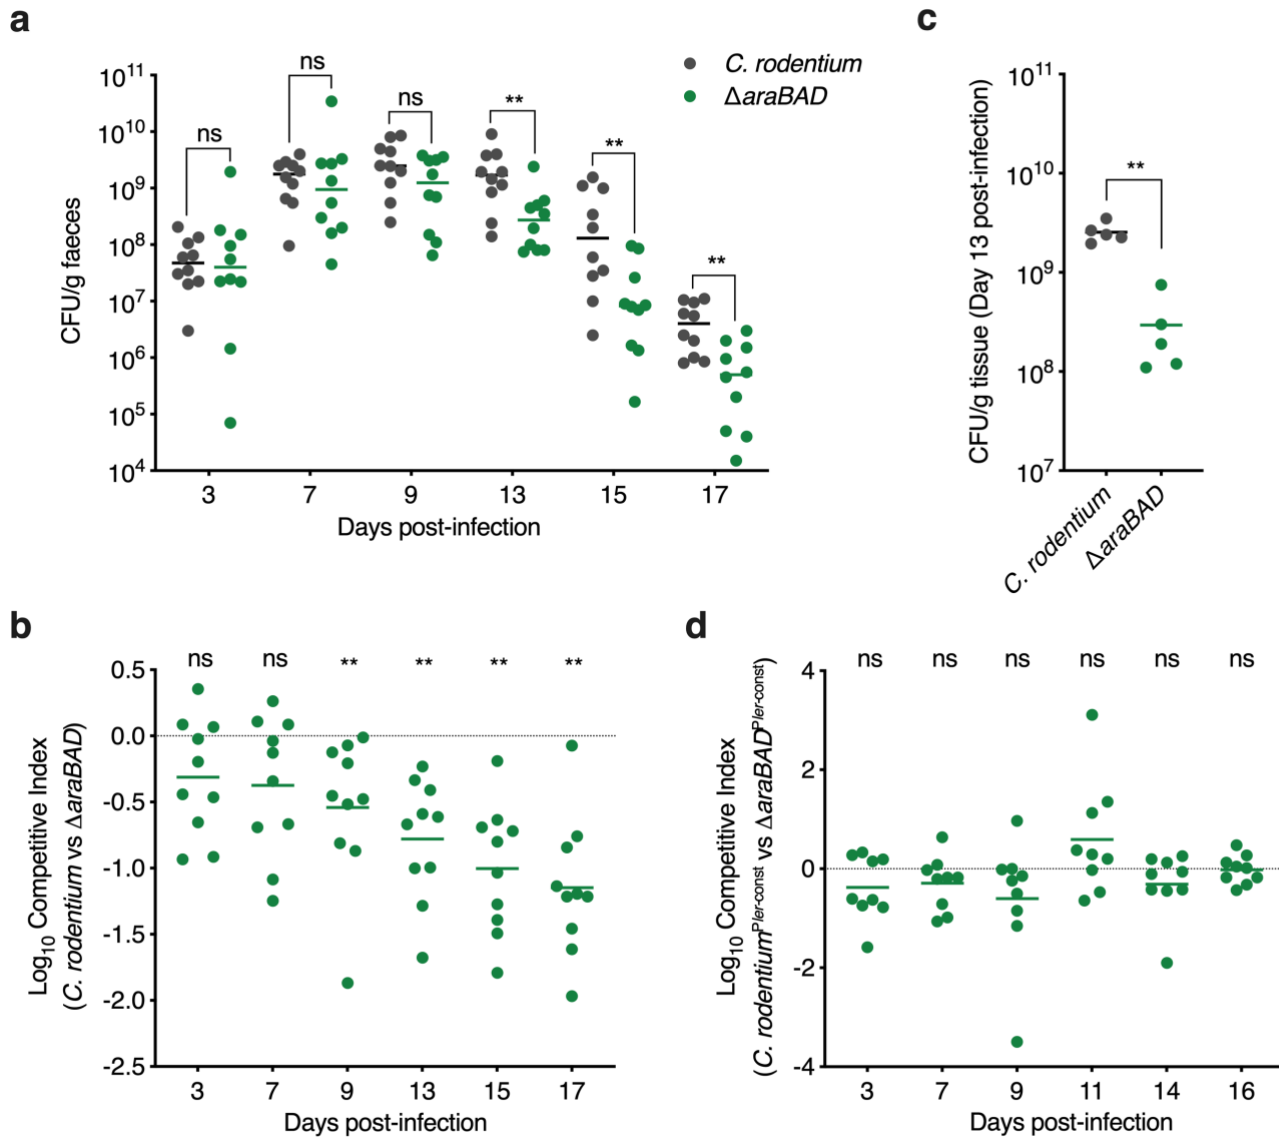

932 **Figure 6. L-arabinose metabolism promotes *C. rodentium* fitness *in vivo* by enhancing T3SS**

933 **expression.** **a**, Faecal shedding dynamics of BALB/c mice (n = 10) orally infected with either

934 *C.rodentium* or  $\Delta araBAD$ . Data points represent the CFU/ml for individual mice as determined

935 from faecal pellets at each timepoint. Statistical significance was determined by Mann-

936 Whitney U test. \*\* and ns indicate  $P < 0.01$  or not significant respectively.

937 **b**, Competitive index of *C.rodentium* versus  $\Delta araBAD$  during infection of BALB/c mice (n =

938 10). Mice were orally infected with a 1:1 mixture of both strains. Data points indicate the fold-

939 decrease in  $\Delta araBAD$  CFU recovered per faecal sample in comparison to wild type *C.*

940 *rodentium*. Statistical significance was determined by Wilcoxon signed-rank test. \*\* and



941 ns indicate  $P < 0.01$  or not significant respectively. **c**, CFU per gram of colon tissue from  
942 mice ( $n = 5$ ) orally infected with either *C.rodentium* or  $\Delta araBAD$ . Statistical significance was  
943 determined by Mann-Whitney U test. \*\* indicates  $P < 0.01$ . **d**, Competitive index of  
944 *C.rodentium*<sup>Pler-const</sup> versus  $\Delta araBAD$ <sup>Pler-const</sup> during infection of BALB/c mice ( $n = 9$ ). Mice were  
945 orally infected with a 1:1 mixture of both strains. ns indicates not significant as determined  
946 by a Wilcoxon signed-rank test.

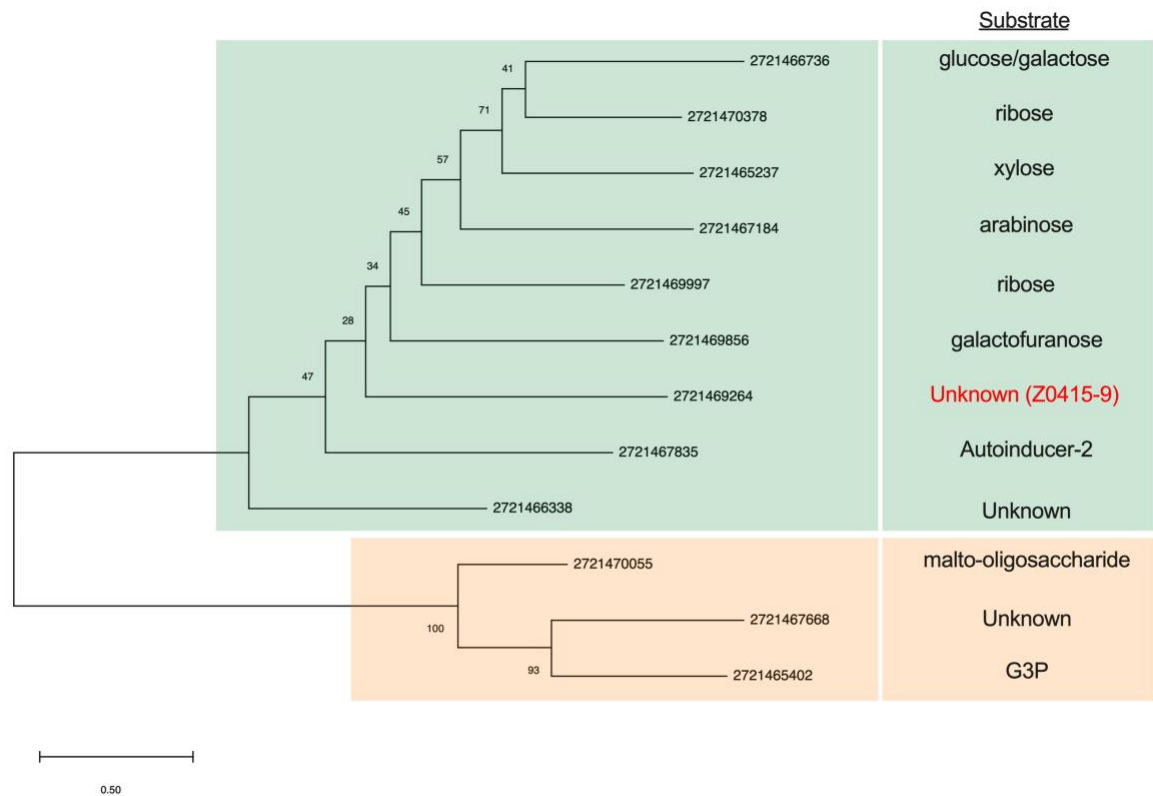

947

948 **Extended Data Fig. 1. Phylogenetic analysis of sugar-specific ABC transporters in EDL933.**

949 Phylogeny was inferred using the maximum-likelihood method and Le Gascuel model, with a

950 Gamma distribution in MegaX. The tree is drawn to scale, with branch lengths measured in

951 the number of substitutions per site. The scale bar represents 0.5 substitutions per site.

952 Bootstrap values are indicated on the respective branches. Clades A and B are coloured green

953 and orange respectively. The predicted substrate for each transporter is indicated next to its

954 respective branch in the tree.

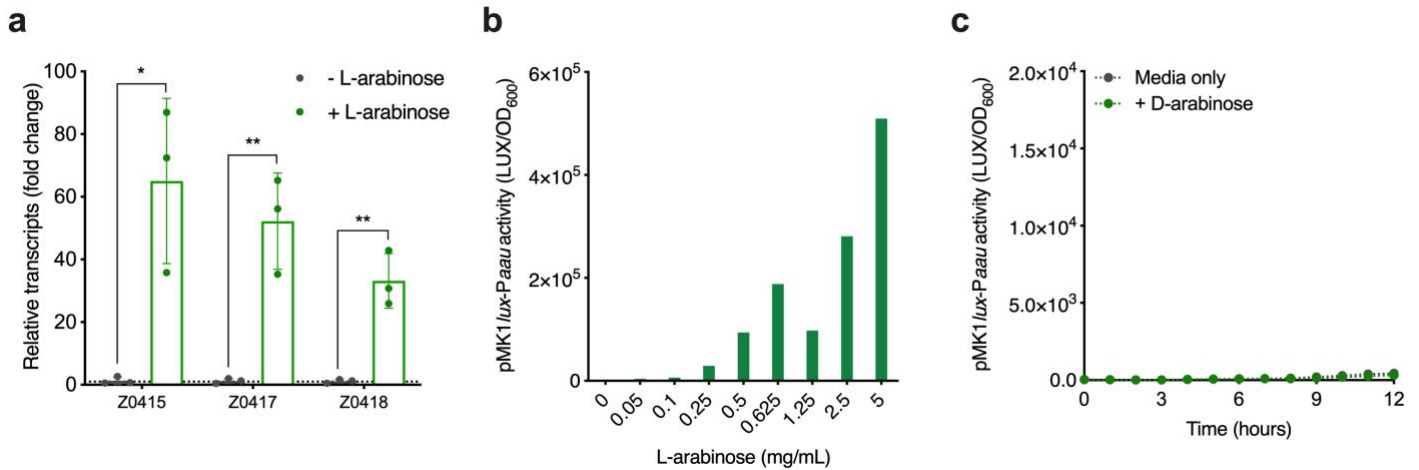

955 **Extended Data Fig. 2. The L-isomer of arabinose induces Z0415-9 in a concentration**  
956 **dependent manner. a,** RT-qPCR analysis of Z0415/7/8 expression in RNA-derived from EHEC  
957 cultured in MEM-HEPES alone or supplemented with L-arabinose. The bars indicate relative  
958 fold-increase of L-arabinose treated cultures over media alone. The dotted line indicates  
959 baseline expression in comparison to the control. Statistical significance was determined by  
960 Student's *t* test. \* and \*\* indicate  $P < 0.05$  or  $P < 0.01$  respectively. Error bars represent  
961 standard deviation from three independent replicates. **b,** Transcriptional reporter assay of  
962 EHEC transformed with pMK1/lux-Paau cultured in MEM-HEPES alone or supplemented with  
963 a range of L-arabinose concentrations. Data are depicted as luminescence units (LUX) divided  
964 by optical density (OD<sub>600</sub>) of the culture after 8 hours of growth. **c,** Transcriptional reporter  
965 assay of EHEC transformed with pMK1/lux-Paau cultured in MEM-HEPES alone or  
966 supplemented with 5 mg/ml D-arabinose. Data from panels **b** and **c** represent a single  
967 replicate from three independent repeats of each experiment.

968

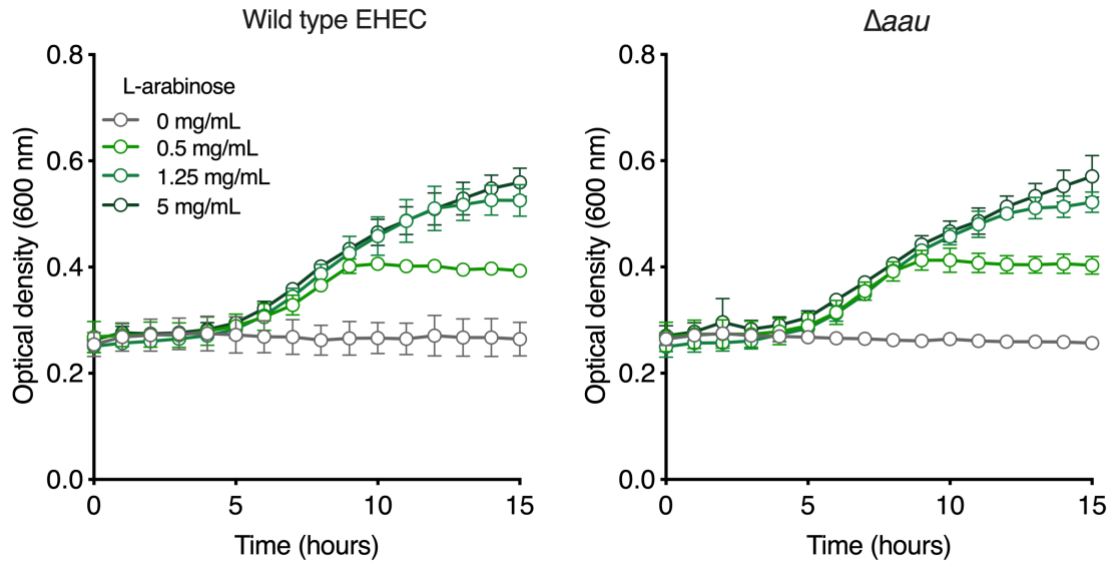

969

970 **Extended Data Fig. 3. Aau is not required for growth on L-arabinose as a sole carbon source.**

971 Growth analysis of parental EHEC and associated  $\Delta aau$  deletion mutant in M9 minimal media

972 supplemented with various concentrations of L-arabinose as a sole carbon source. The error

973 bars indicate standard deviation based on three independent repeats.

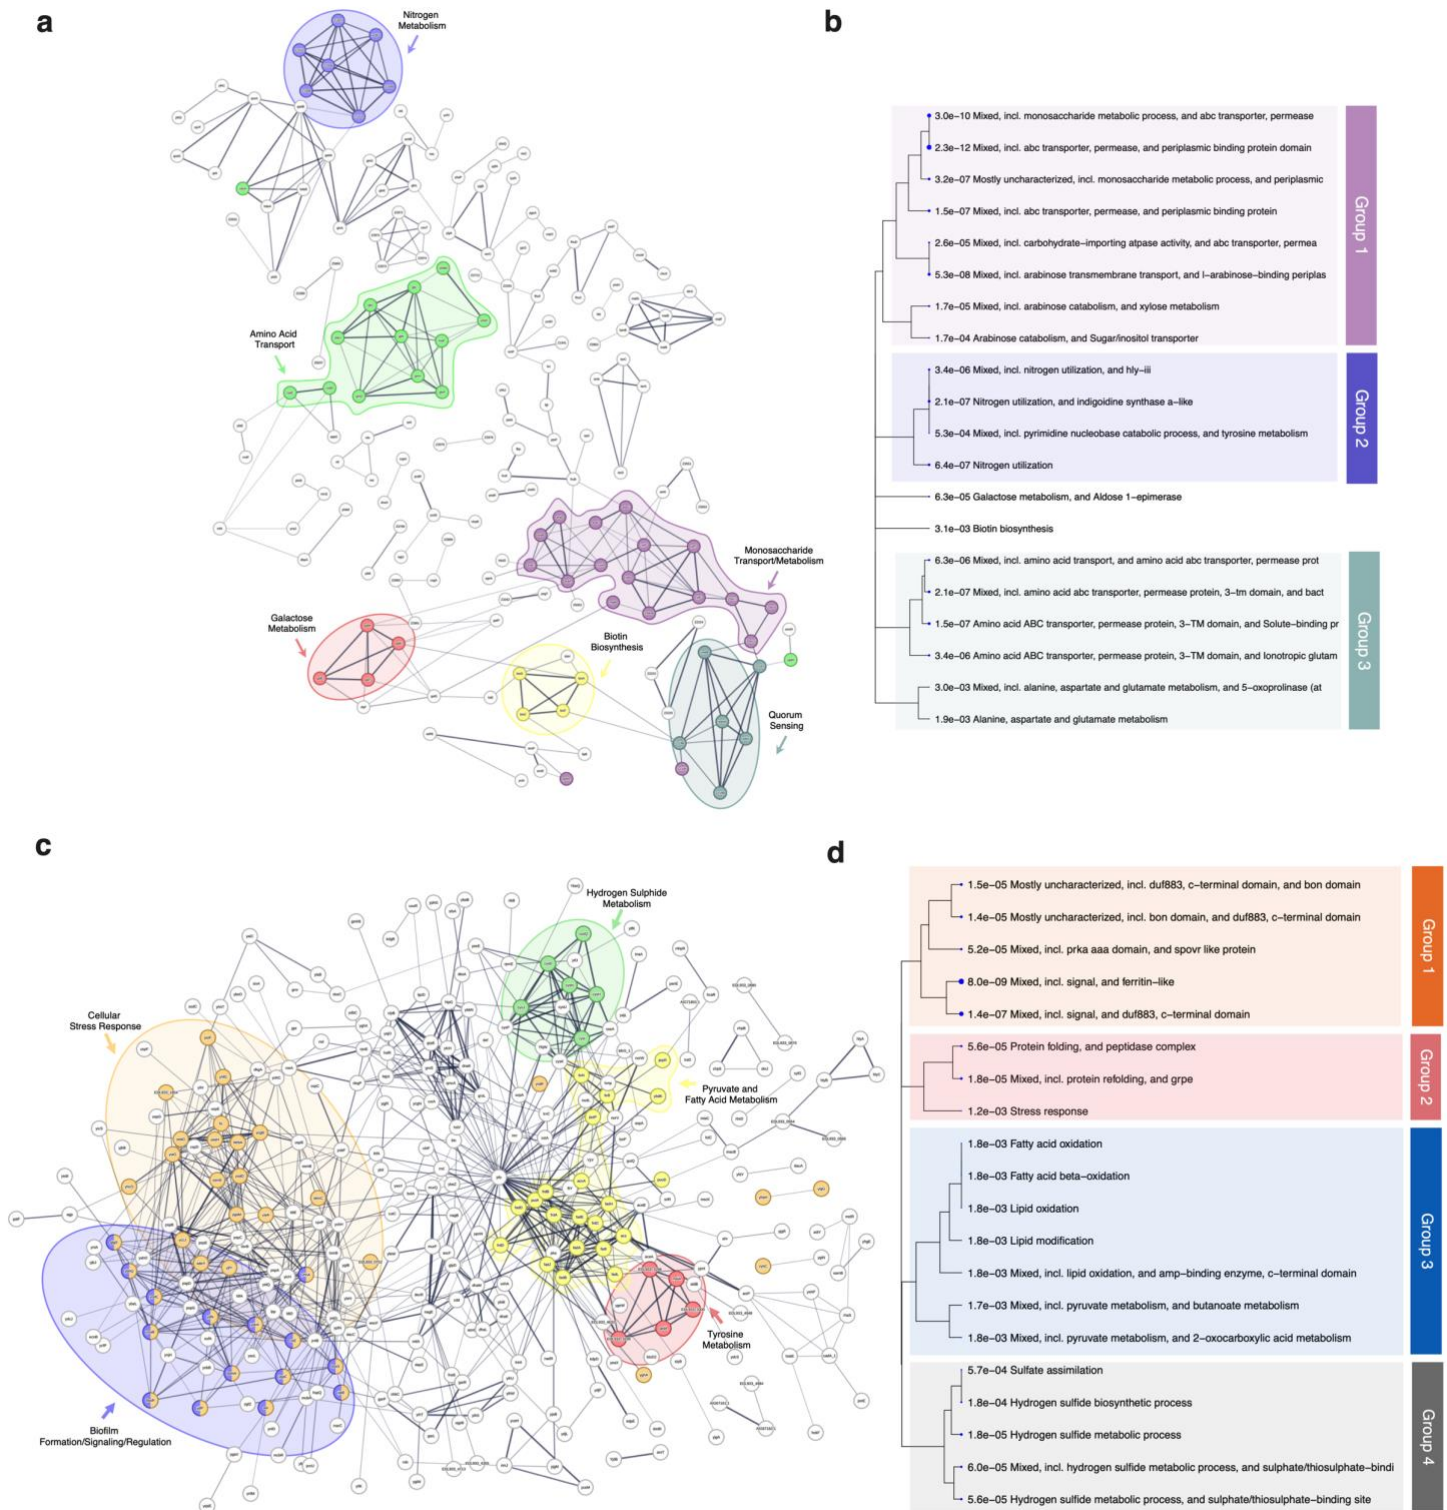

974 **Extended Data Fig. 4. L-arabinose induces a global transcriptional shift in EHEC. a,c, STRING**  
 975 network analysis of predicted protein-protein interactions based upon upregulated or  
 976 downregulated genes identified by RNA-seq analysis of EHEC cultured in MEM-HEPES  
 977 supplemented with L-arabinose. Line thickness is indicative of confidence in the interactions

978 between proteins. Disconnected nodes were removed from the network to improve clarity.  
979 Distinct functional clusters that are enriched are in coloured bubbles. **b,d**, Hierarchical  
980 clustering tree summarising the correlation among significant STRING pathways generated  
981 using ShinyGO. Pathways that are enriched with shared genes are grouped together. Larger  
982 dots indicate more significant *P*-values.

983

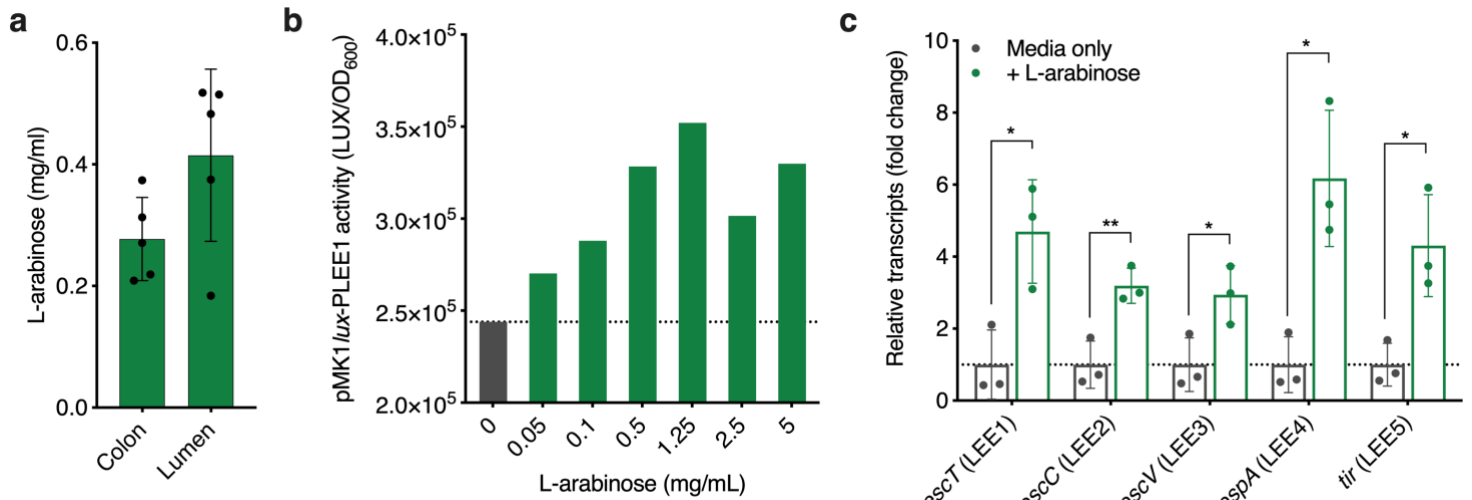

984 **Extended Data Fig. 5. L-arabinose induces LEE expression at concentration relevant to the**

985 **gut. a**, Quantification of L-arabinose from colon tissue and luminal content of BALB/c mice

986 maintained on a conventional diet (n = 5). **b**, Transcriptional reporter assay of EHEC

987 transformed with pMK1/lux-PLLEE1 cultured in MEM-HEPES alone or supplemented with a

988 range of L-arabinose concentrations. Data are depicted as luminescence units (LUX) divided

989 by optical density (OD<sub>600</sub>) of the culture after 8 hours of growth. The data represent a single

990 replicate from three independent repeats of the experiment. **c**, RT-qPCR analysis of relative

991 LEE1-5 expression in RNA-derived from EHEC cultured in MEM-HEPES alone or supplemented

992 with L-arabinose. The bars indicate relative fold-increase of L-arabinose treated cultures over

993 media alone. The dotted line indicates baseline expression in comparison to the control.

994 Statistical significance was determined by Student's *t* test. \* and \*\* indicate  $P < 0.05$  or  $P <$

995  $0.01$  respectively. Error bars represent standard deviation from three independent

996 replicates.

997

a

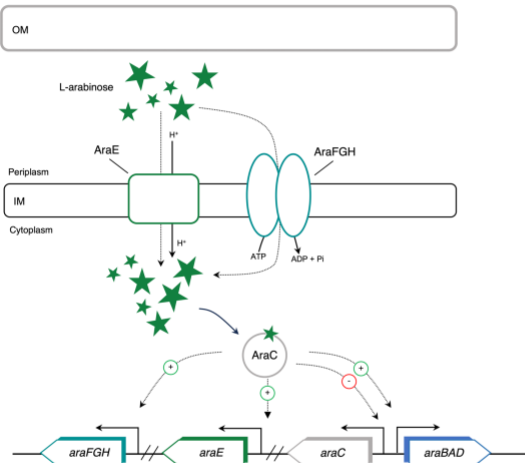

b

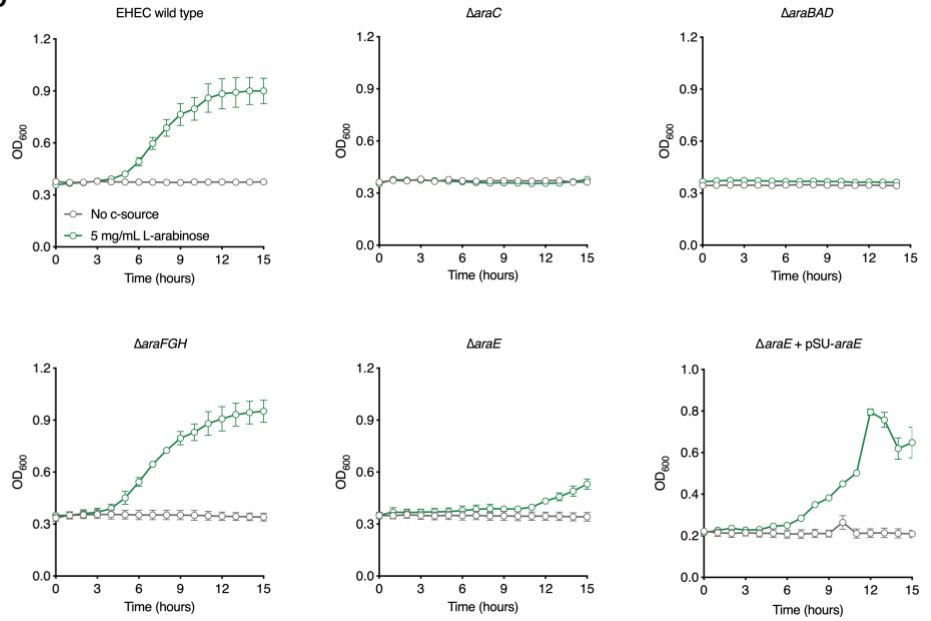

998 **Extended Data Fig. 6. Growth analysis of mutants from each stage of the L-arabinose**

999 **utilisation pathway in EHEC. a**, Schematic illustration of the canonical pathway for L-

1000 arabinose uptake, sensing and catabolism within the cell. **b**, Growth curves of wild type EHEC

1001 and the indicated deletion mutants in M9 minimal media with no carbon source (grey,

1002 control) or supplemented with 5 mg/ml L-arabinose (green). Experiments were performed on

1003 three independent occasions and the error bars represent the standard deviation.

1004



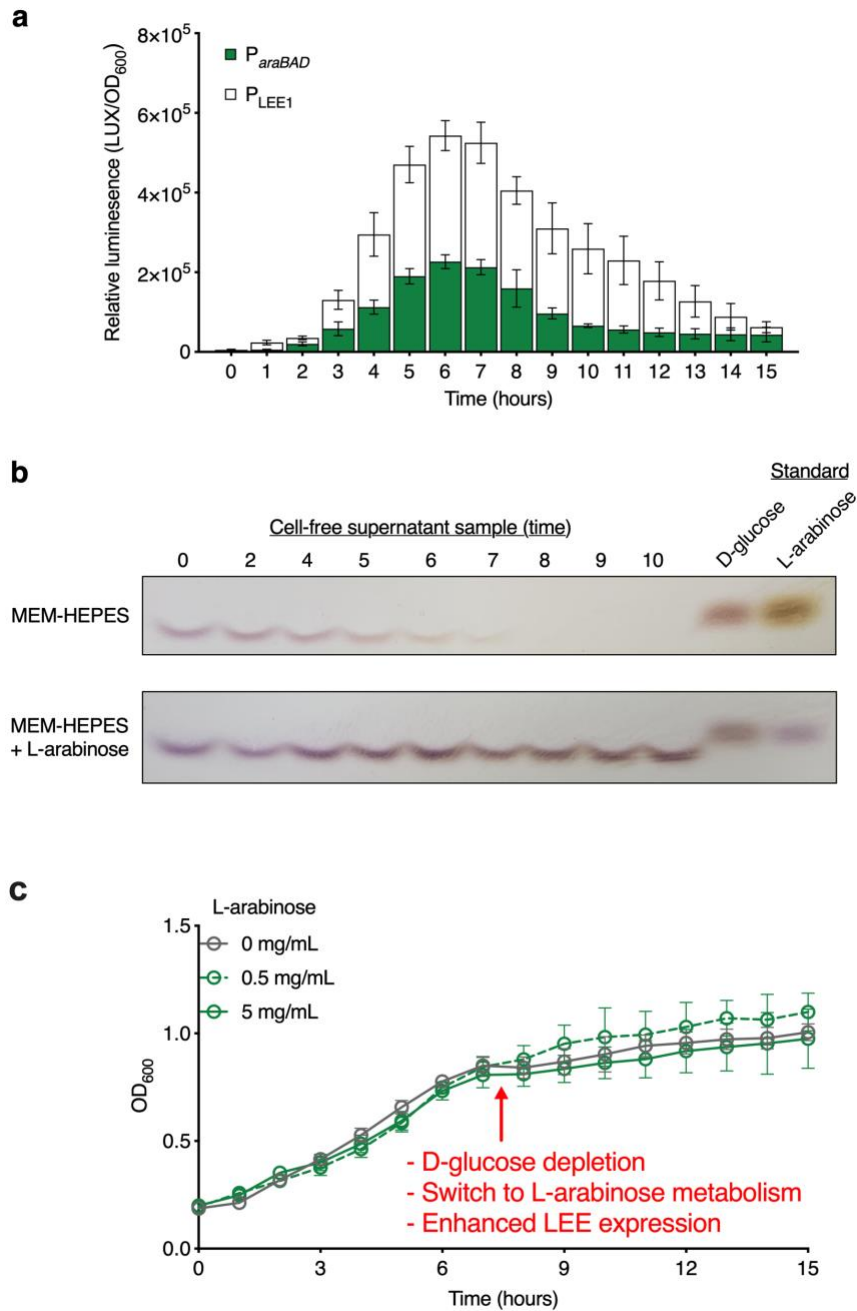

1005

1006 **Extended Data Fig. 7. L-arabinose metabolism and enhanced LEE expression are co-**

1007 **ordinated in EHEC. a,** Transcriptional reporter assay of EHEC transformed with either

1008 pMK1lux-*PLEE1* or pMK1lux-*ParaBAD* cultured in MEM-HEPES supplemented with L-

1009 arabinose. The experiments were performed under identical growth conditions and samples

1010 taken in parallel. The data are depicted as luminescence units (LUX) divided by optical density

1011 (OD<sub>600</sub>) of the culture at each timepoint. Error bars indicate standard error of the mean from

1012 three independent repeats. **b**, Thin layer chromatography analysis of cell-free supernatant  
1013 derived from cultures of EHEC grown in MEM-HEPES alone or supplemented with 1 mg/ml L-  
1014 arabinose. Samples were taken at the indicated timepoints and the standards for D-glucose  
1015 and L-arabinose are positioned on the right. The result represents a single replicate from three  
1016 independent experiments. **c**, Representative growth curve of EHEC grown in MEM-HEPES  
1017 alone or supplemented with various concentrations of L-arabinose. The red arrow indicates  
1018 the point at which D-glucose is depleted from the media (derived from panel **b**) and the  
1019 phenotypic switch associated with this event.  
1020

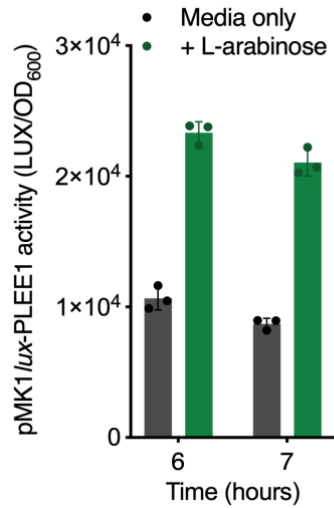

1021

1022 **Extended Data Fig. 8. L-arabinose induces LEE expression in *C.rodentium*.** Transcriptional

1023 reporter assay of wild type *C. rodentium* transformed with pMK1/ux-PL EE1 cultured in MEM-

1024 HEPES alone or supplemented with L-arabinose. Data are depicted as luminescence units

1025 (LUX) divided by optical density (OD<sub>600</sub>) of the sample at various timepoints. Error bars

1026 represent standard error of the mean derived from three independent experiments.

1027
